# Supplementary material for: An efficient proteome-wide strategy for discovery and characterization of cellular nucleotide-protein interactions
Source: PubMed Central journal article supplement (PMC6283526; doi:10.1371/journal.pone.0208273), 2018-12-06

# ITDR CETSA data plotting

Non-denatured protein fraction

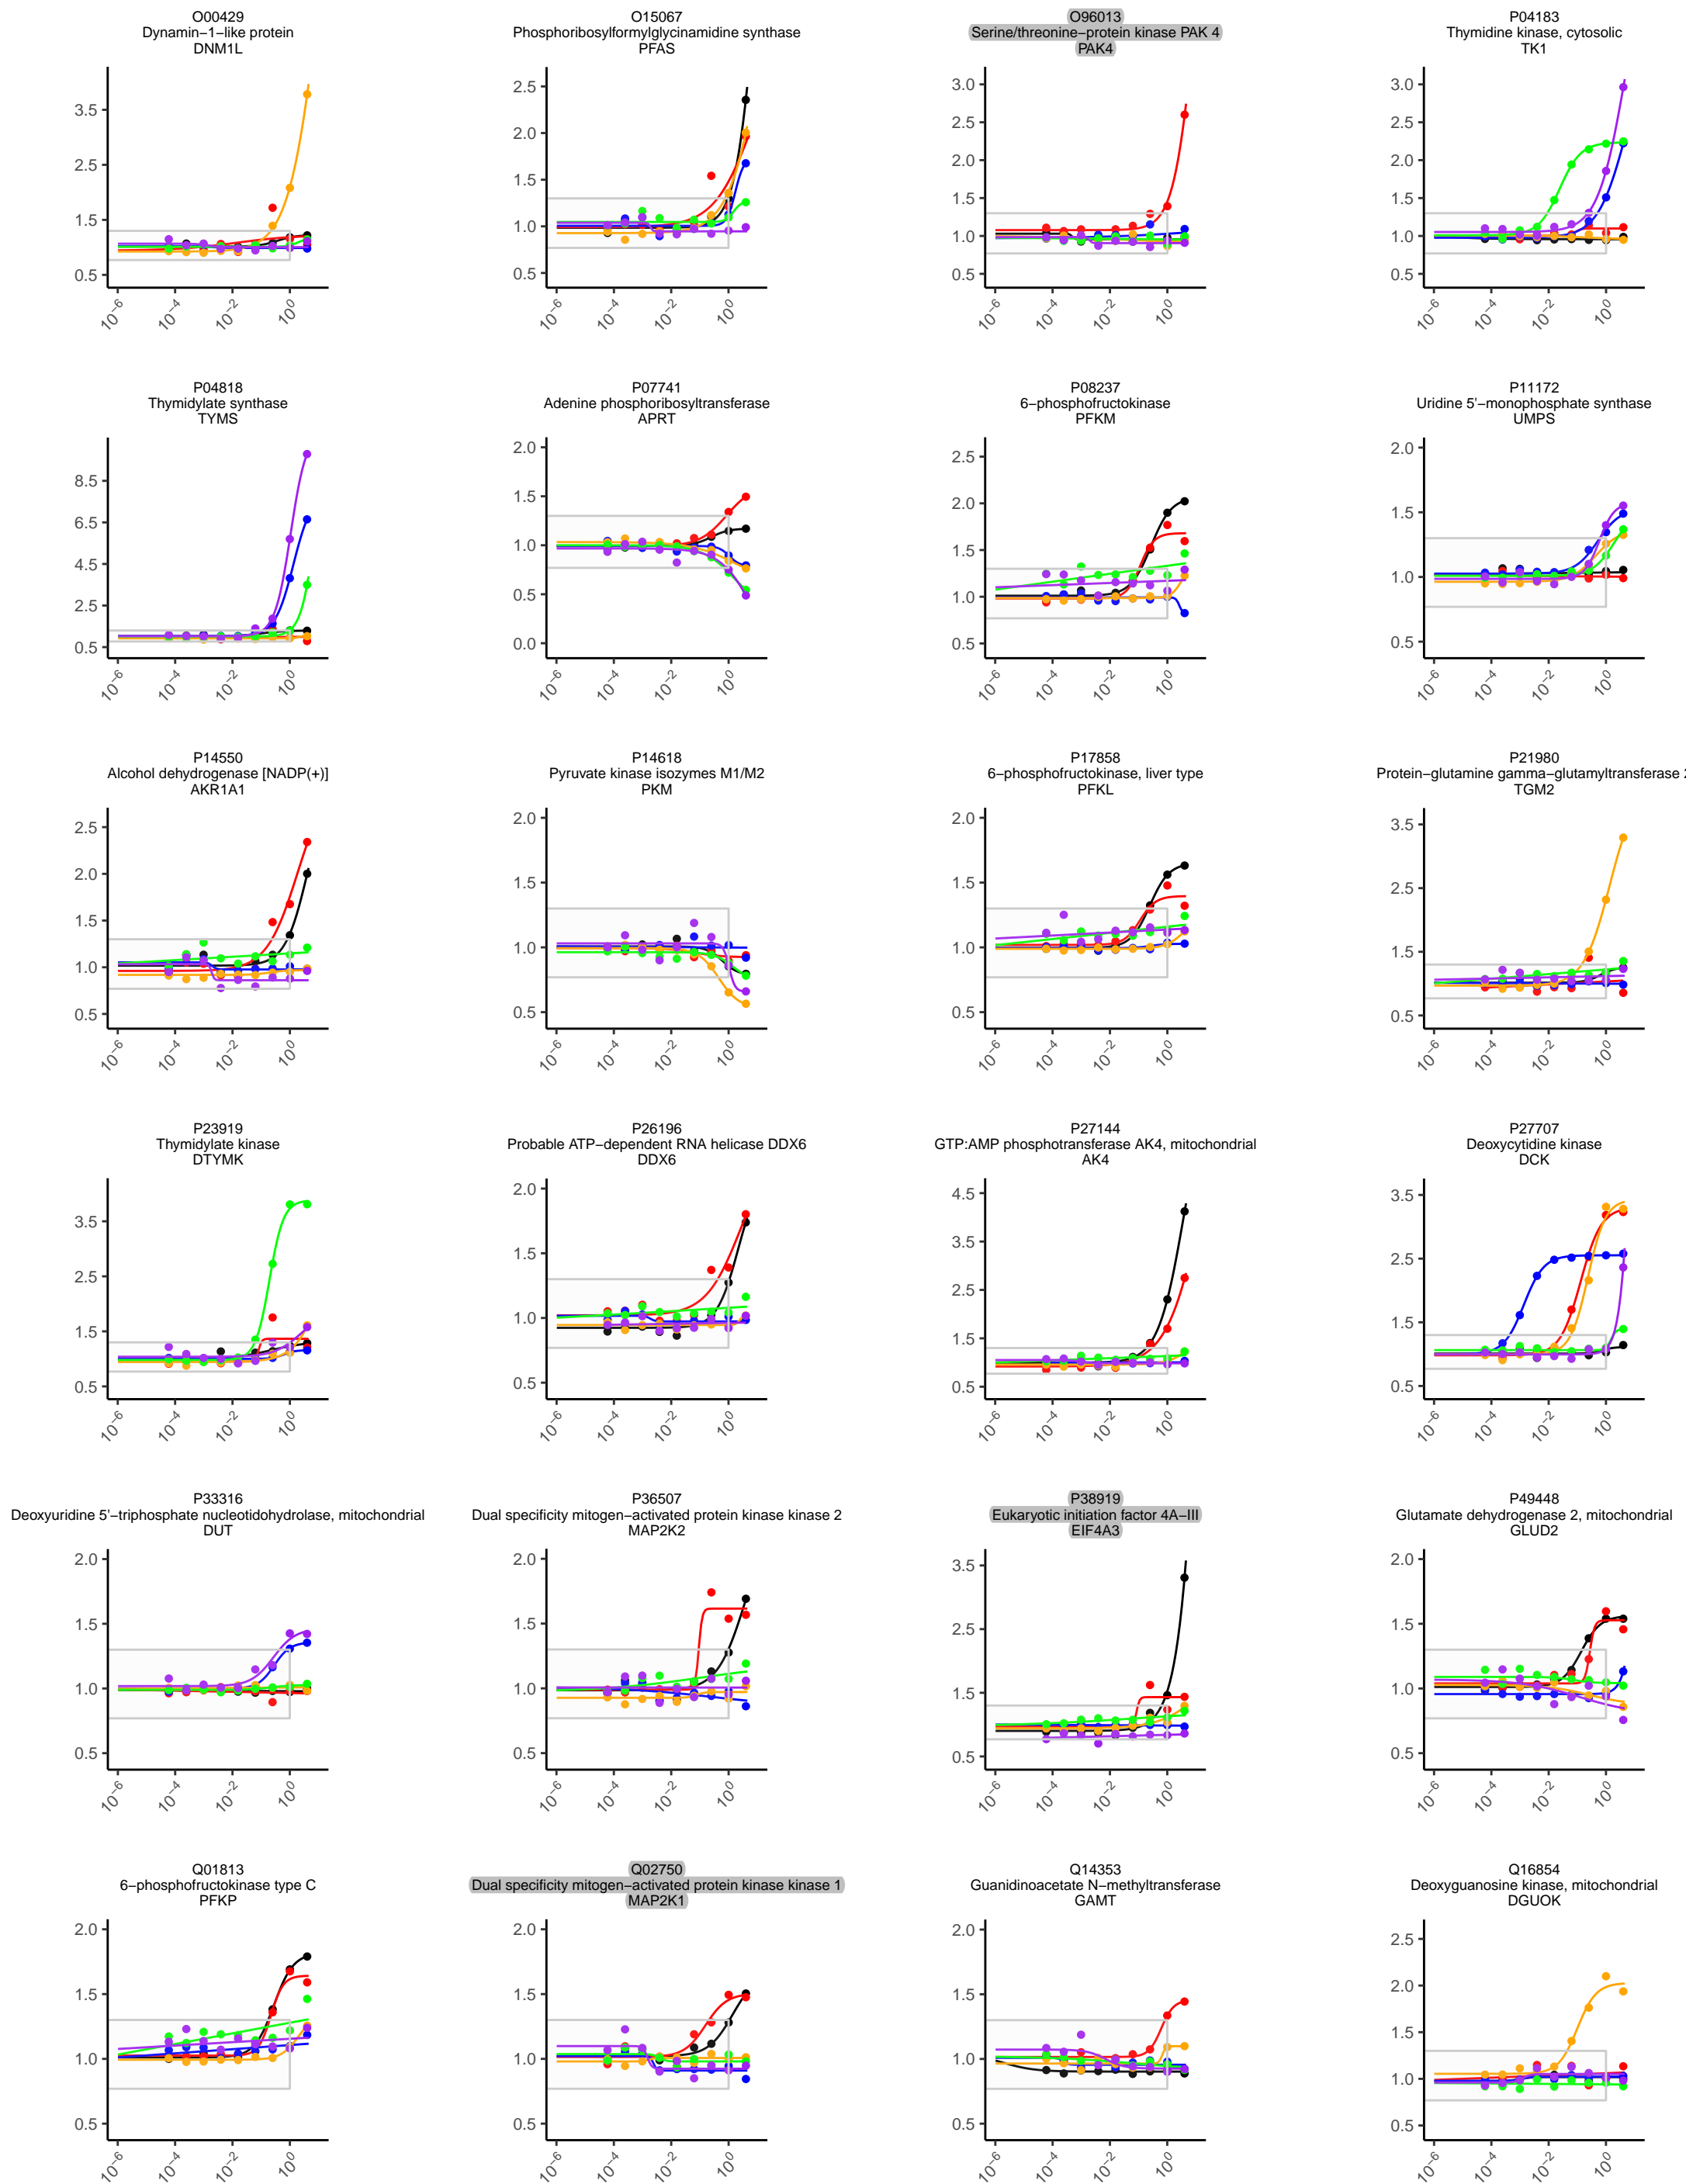

Compound concentration(mM)

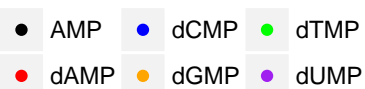

# ITDR CETSA data plotting

**Q5T1V6**  
Probable ATP-dependent RNA helicase DDX59  
DDX59

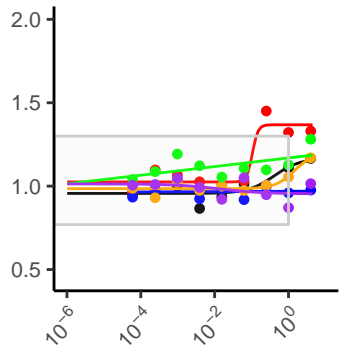

**Q8N142**  
Adenylosuccinate synthetase isozyme 1  
ADSSL1

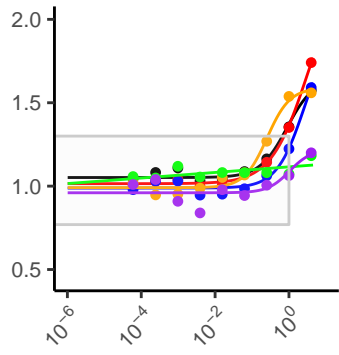

**Q8NCN5**  
Pyruvate dehydrogenase phosphatase regulatory subunit, mitochondrial  
PDPR

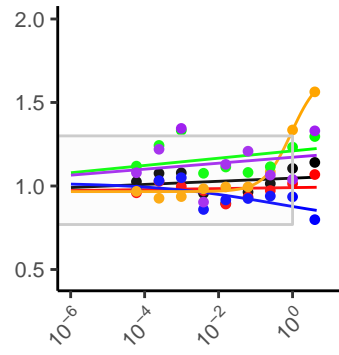

**Q92900**  
Regulator of nonsense transcripts 1  
UPF1

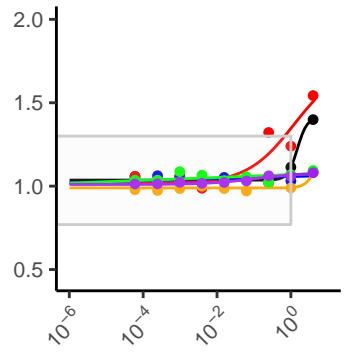

**Q969T7**  
7-methylguanosine phosphate-specific 5'-nucleotidase  
NT5C3B

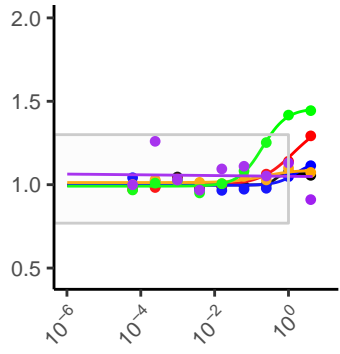

**Q9Y6Y0**  
Influenza virus NS1A-binding protein  
IVNS1ABP

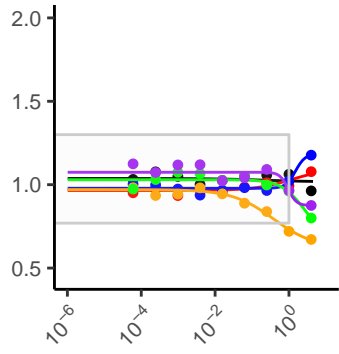

**P51812**  
Ribosomal protein S6 kinase alpha-3  
RPS6KA3

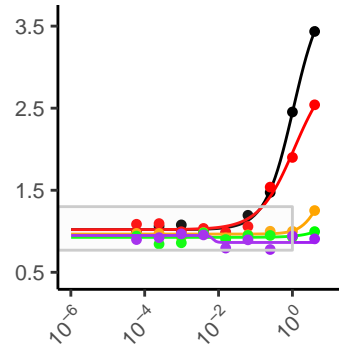

**Q15418**  
Ribosomal protein S6 kinase alpha-1  
RPS6KA1

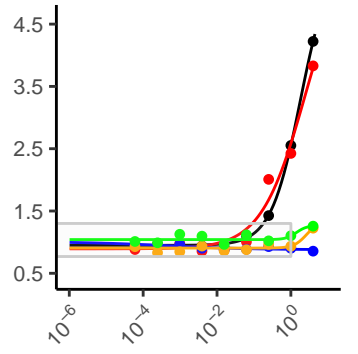

**Q9H2U1**  
Probable ATP-dependent RNA helicase DHX36  
DHX36

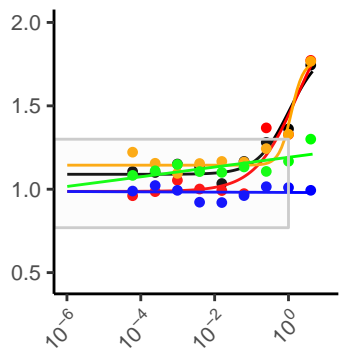

**Q9UJT0**  
Tubulin epsilon chain  
TUBE1

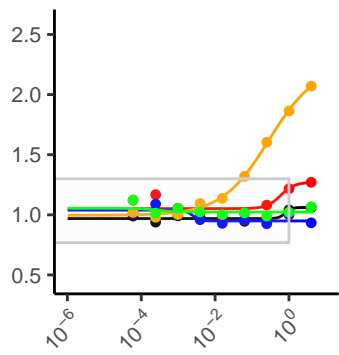

Non-denatured protein fraction

Compound concentration(mM)

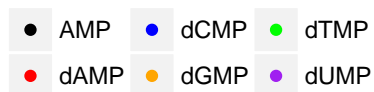

Supplement: pone.0208273.s007.pdf [file pone.0208273.s007.pdf]
