# Supplementary material for: An efficient proteome-wide strategy for discovery and characterization of cellular nucleotide-protein interactions
Source: PubMed Central journal article supplement (PMC6283526; doi:10.1371/journal.pone.0208273), 2018-12-06

# ITDR CETSA data plotting

Non-denatured protein fraction

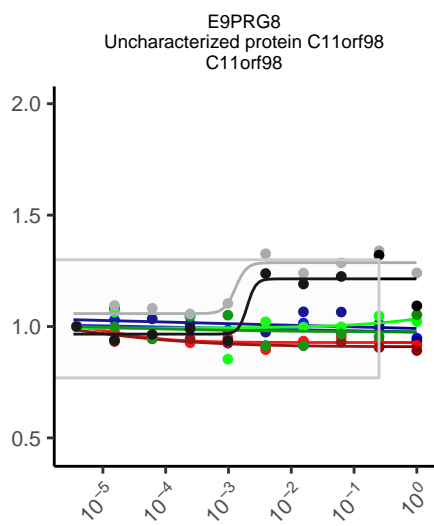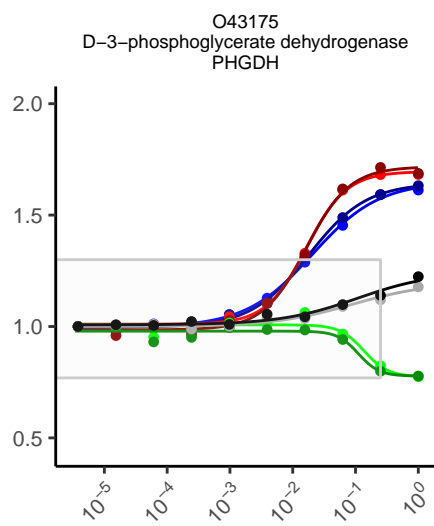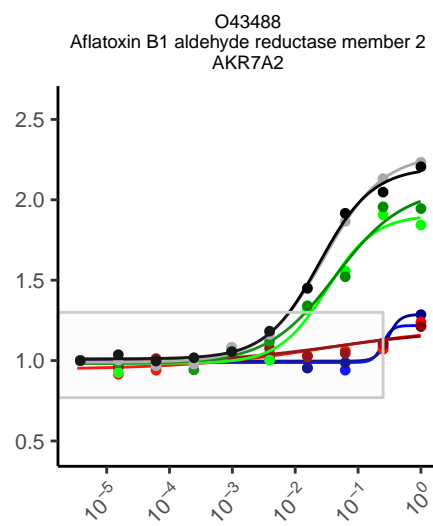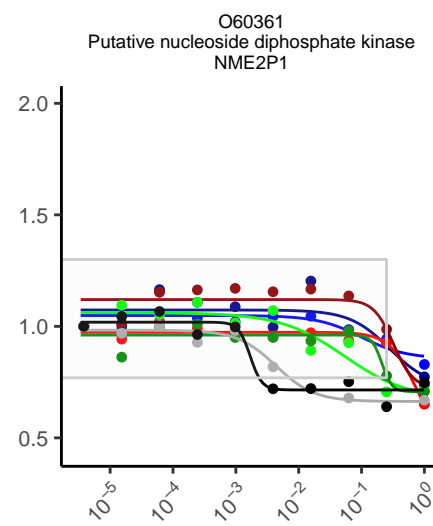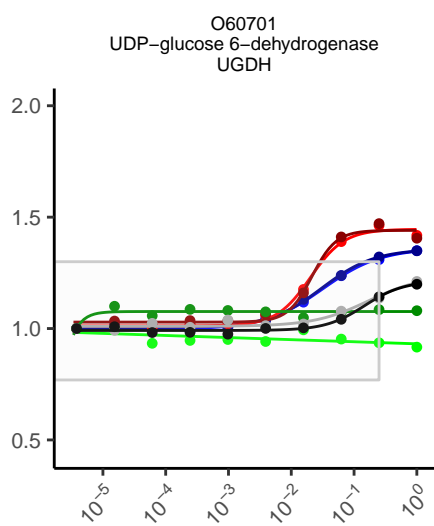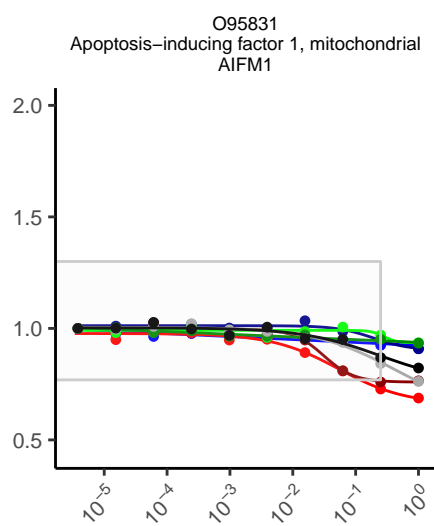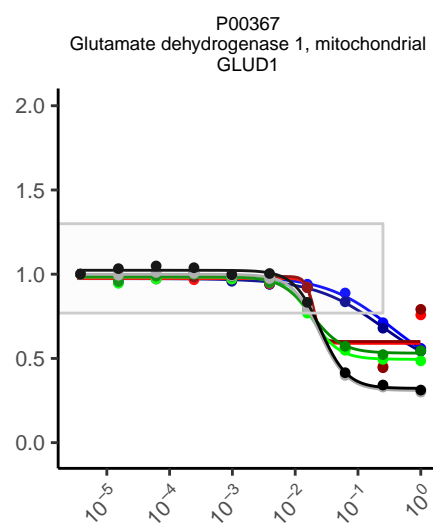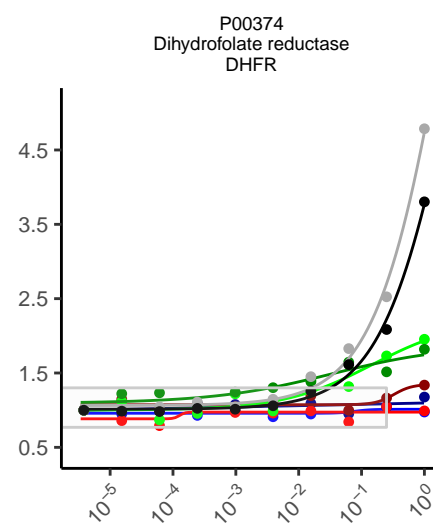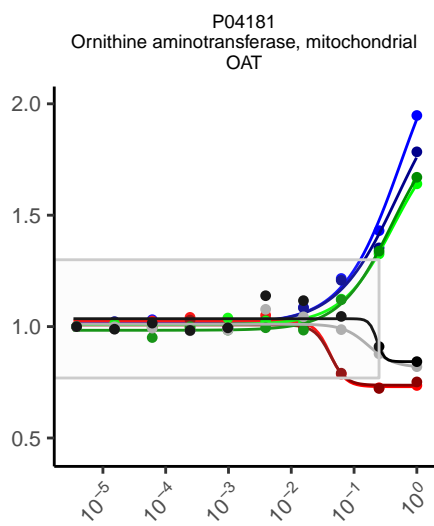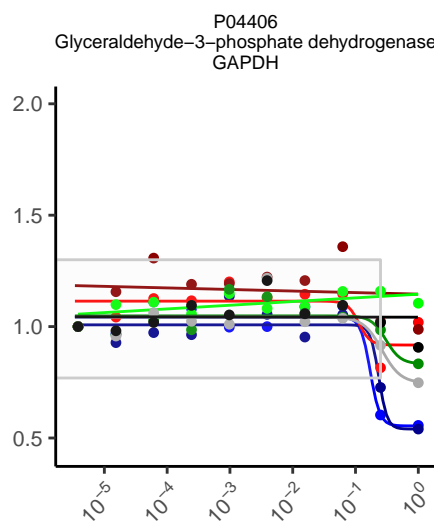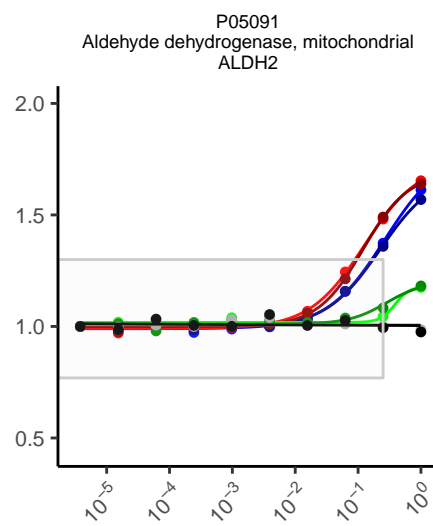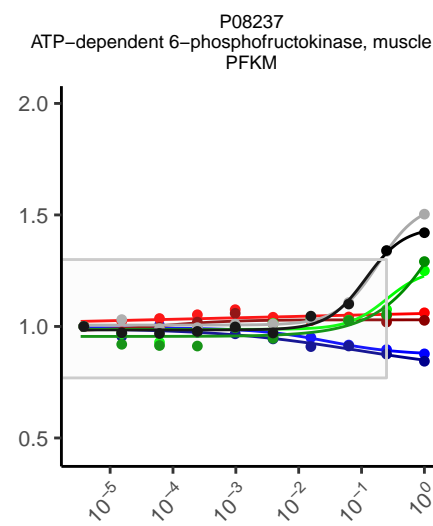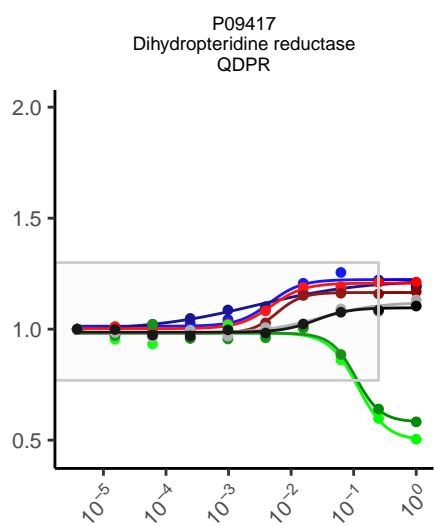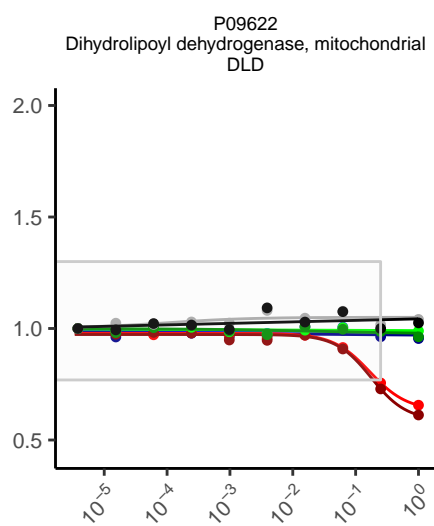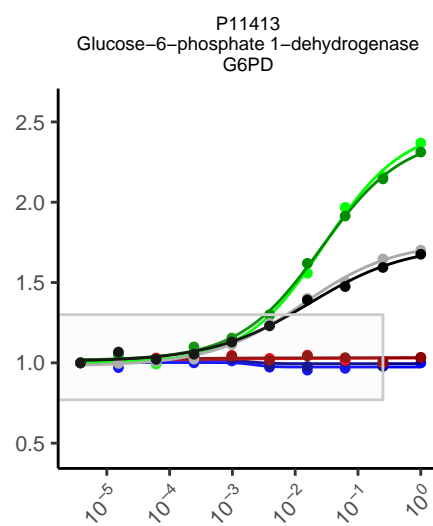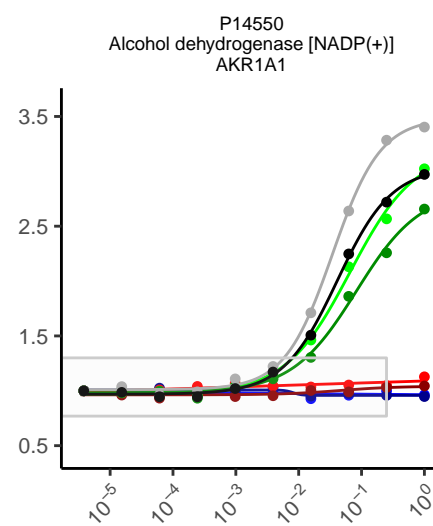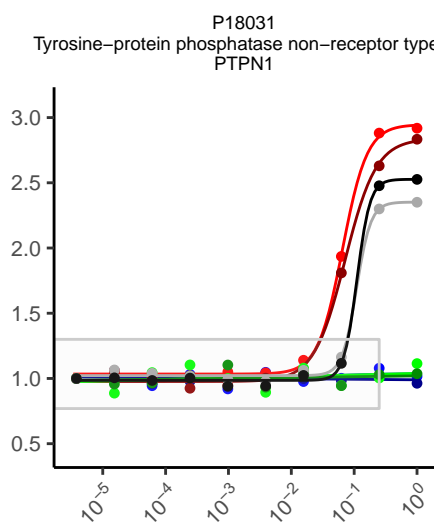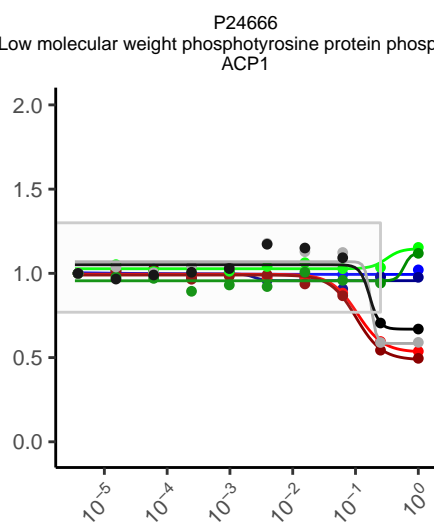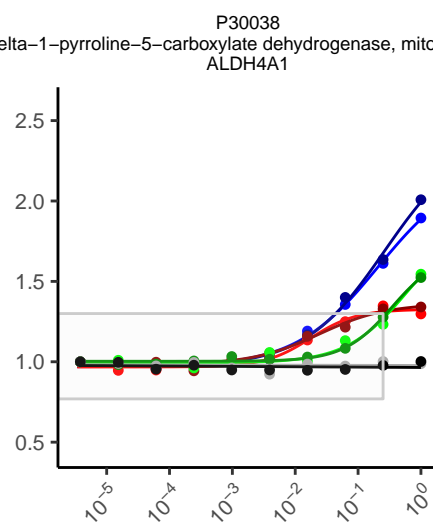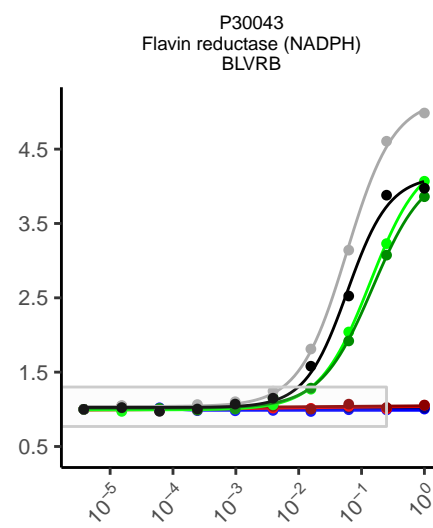

Compound concentration(mM)

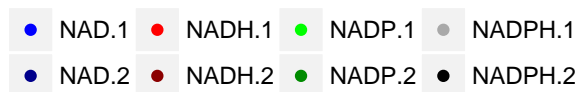

# ITDR CETSA data plotting

Non-denatured protein fraction

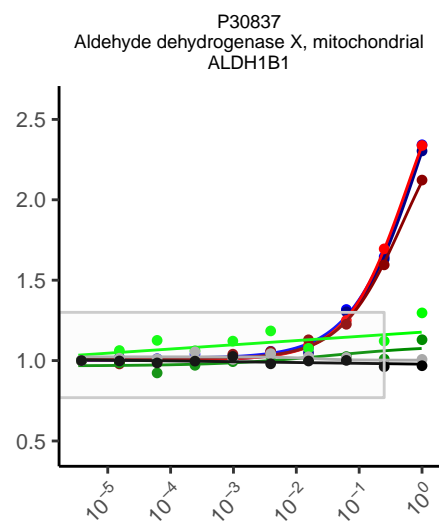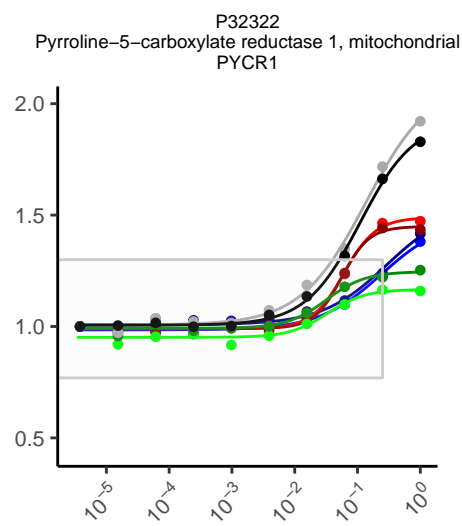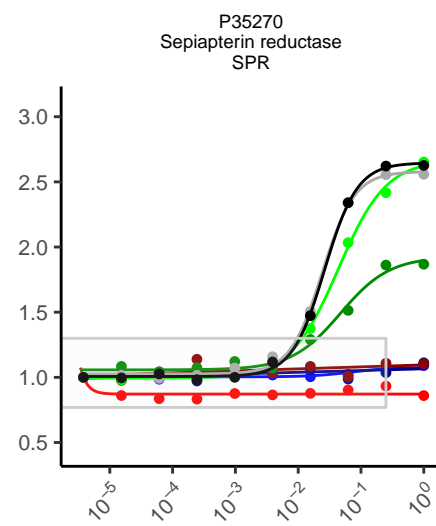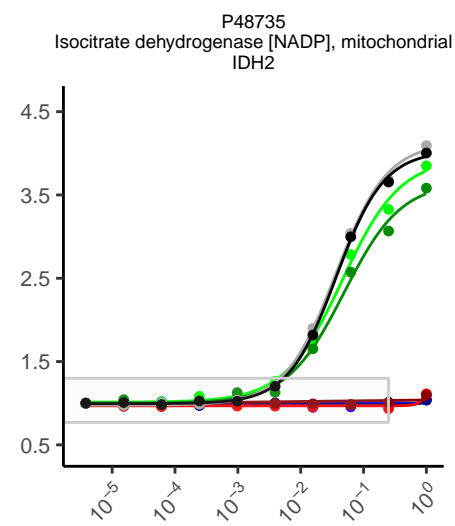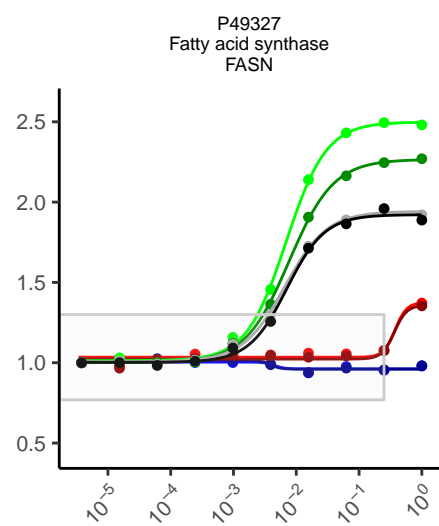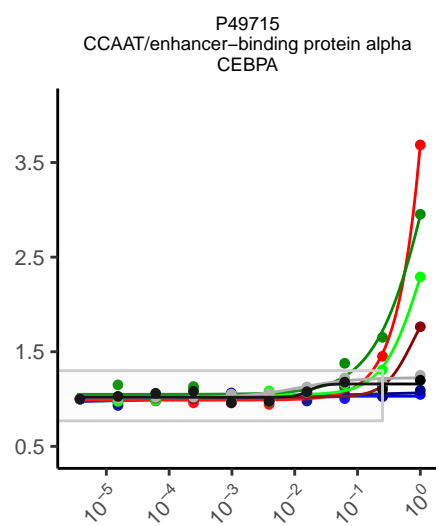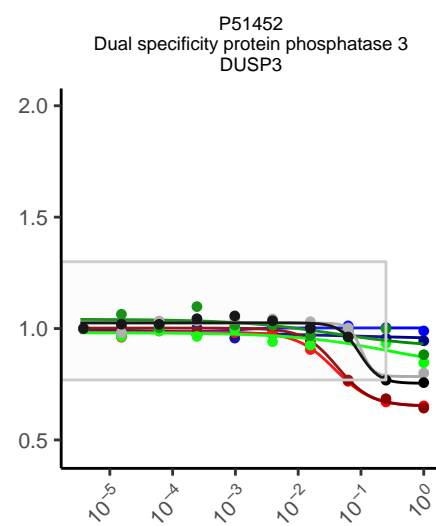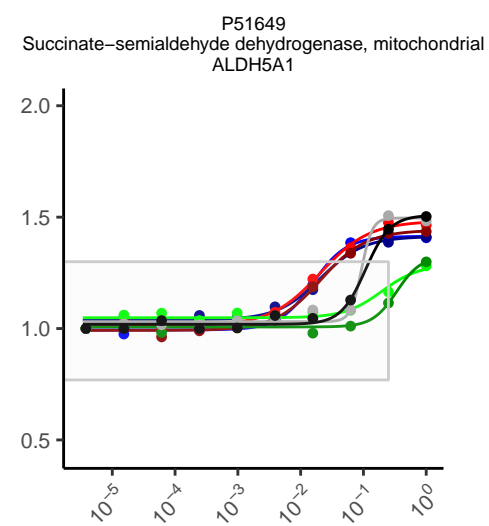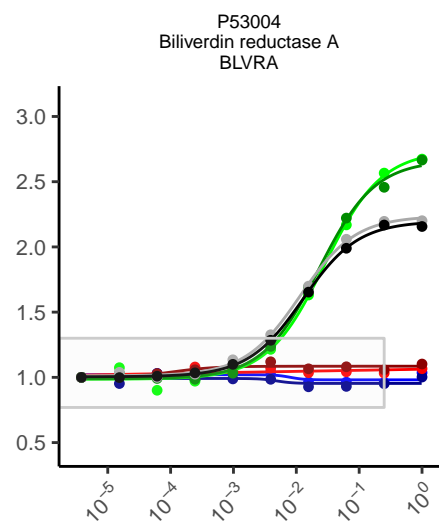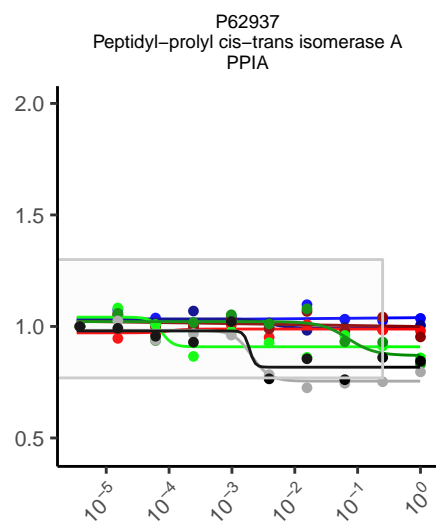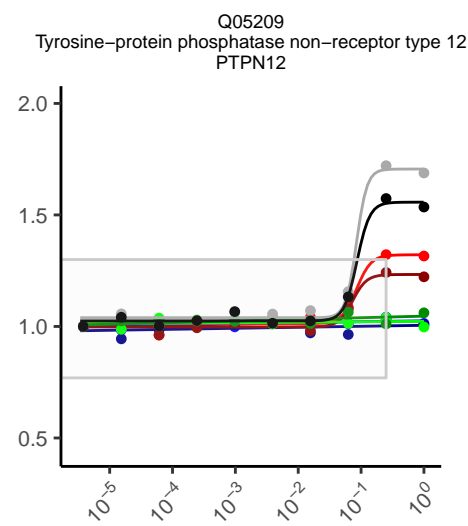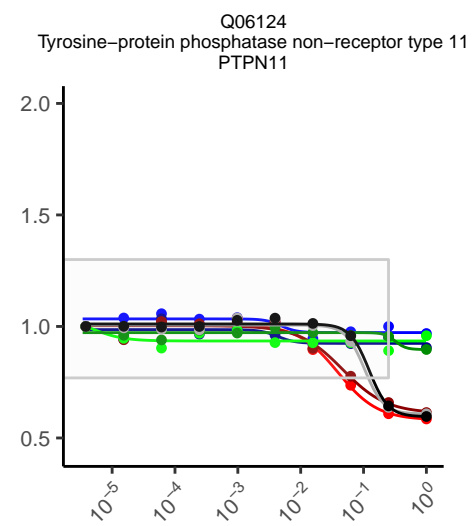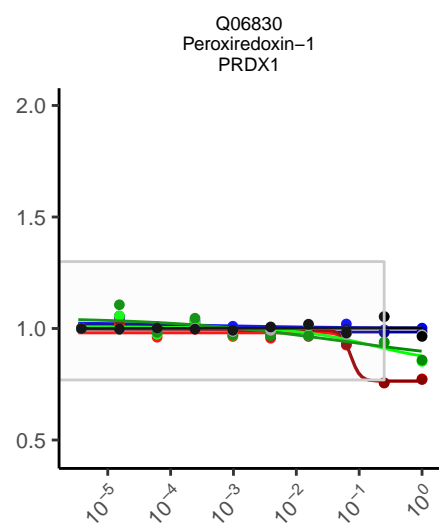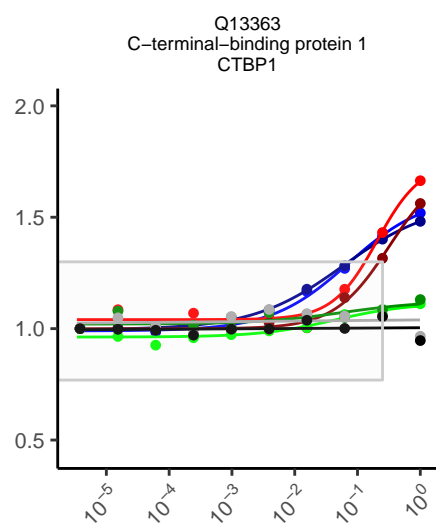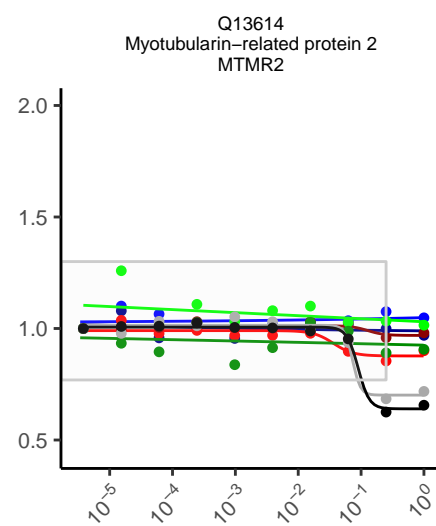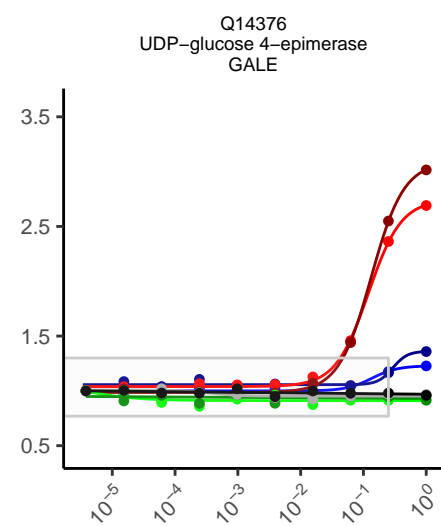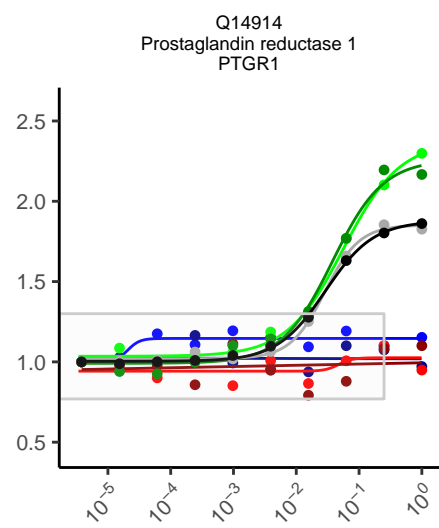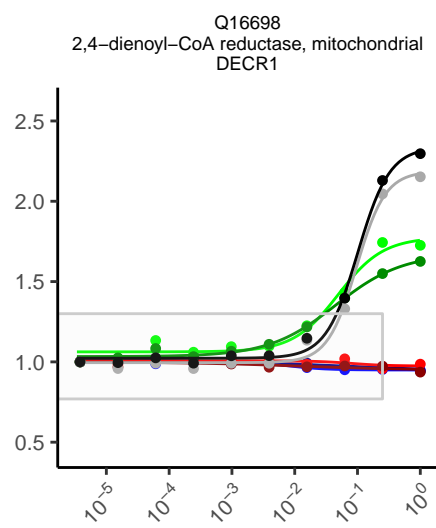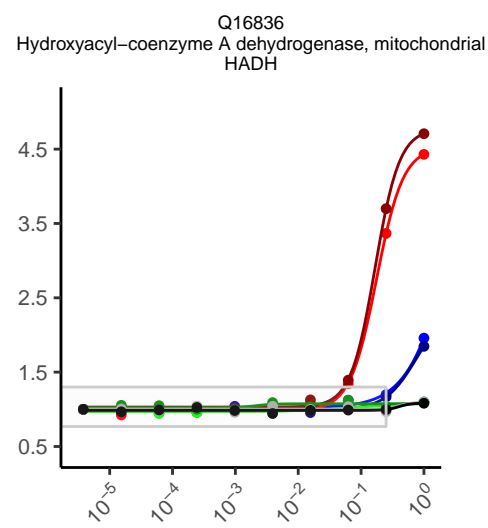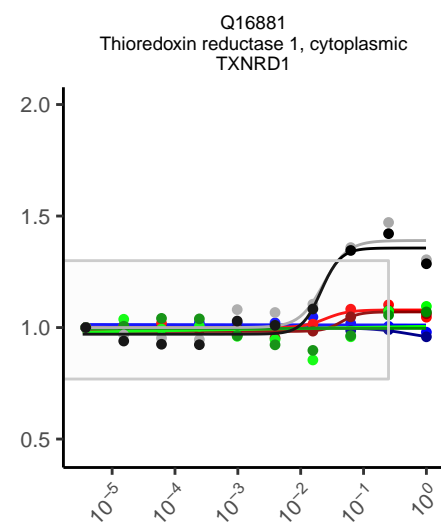

Compound concentration(mM)

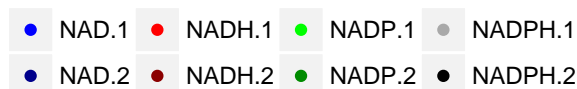

# ITDR CETSA data plotting

Non-denatured protein fraction

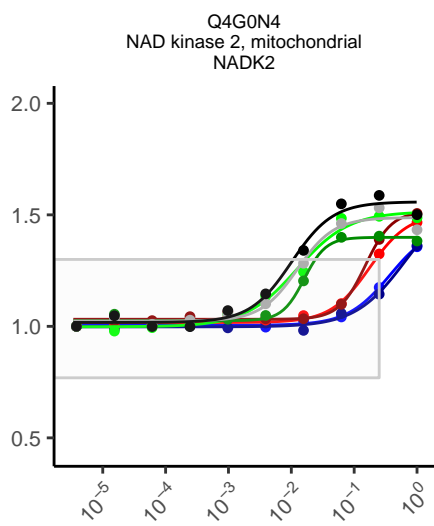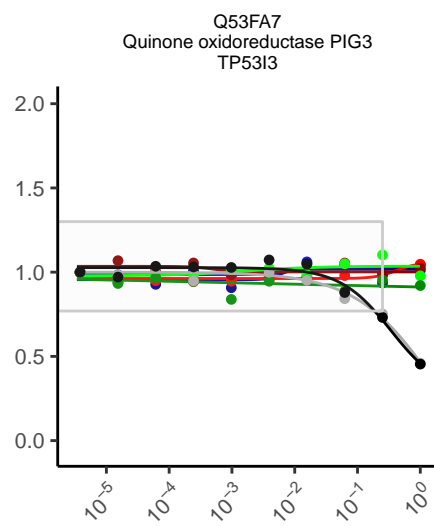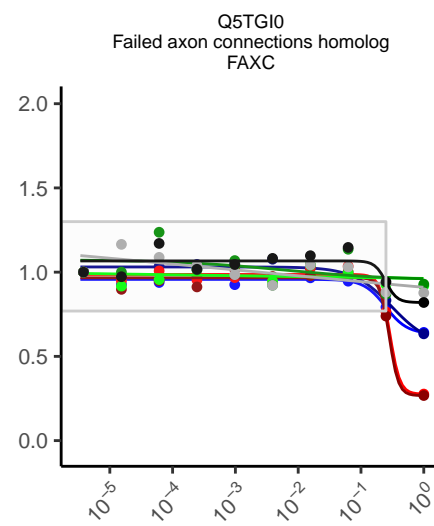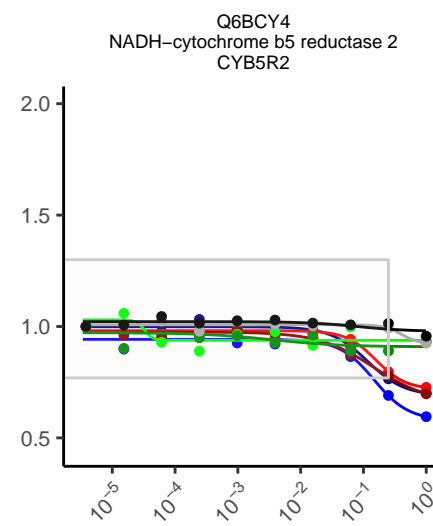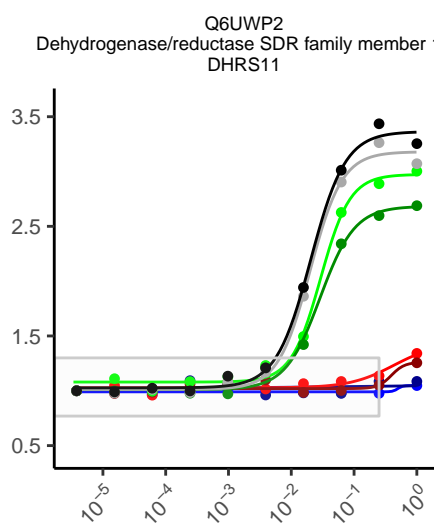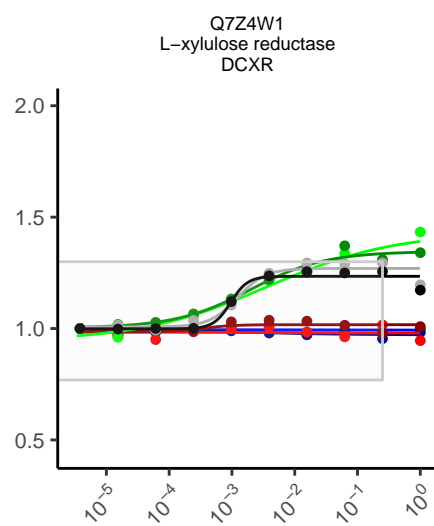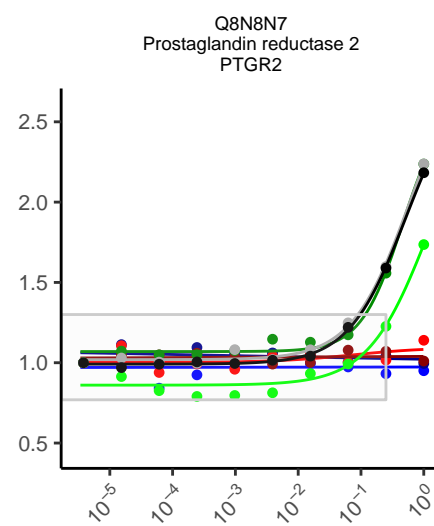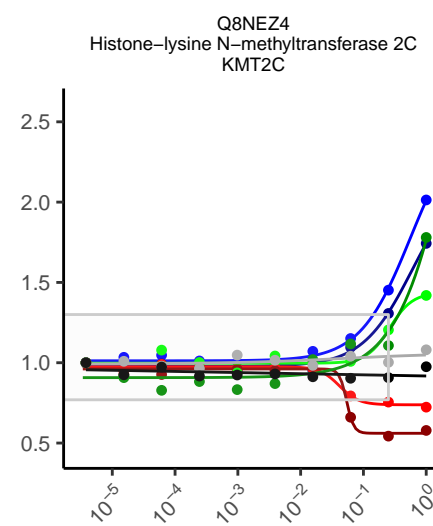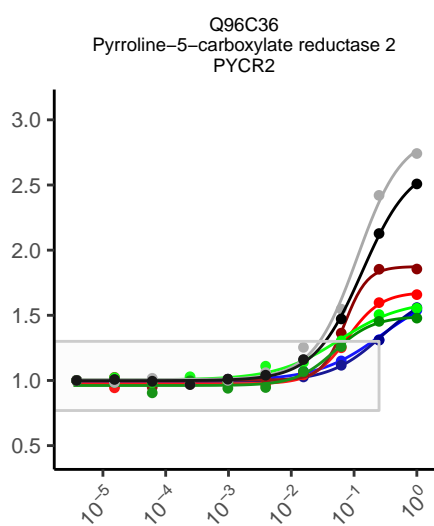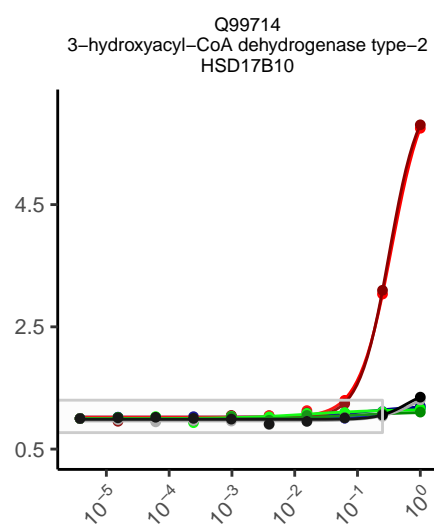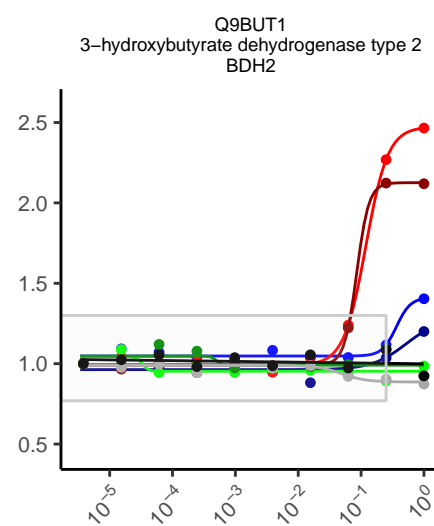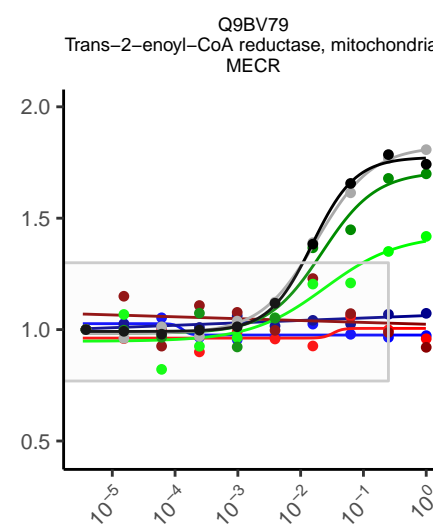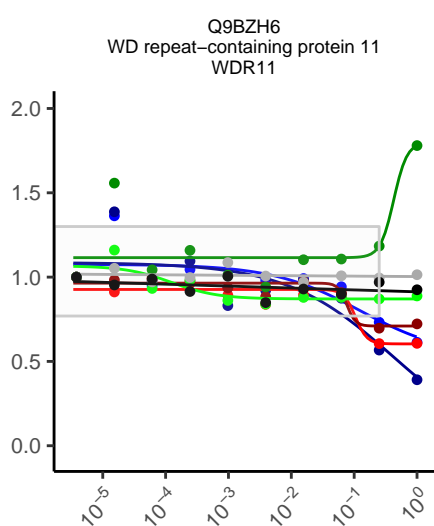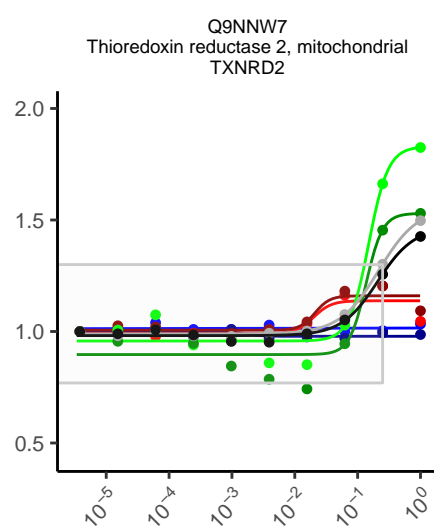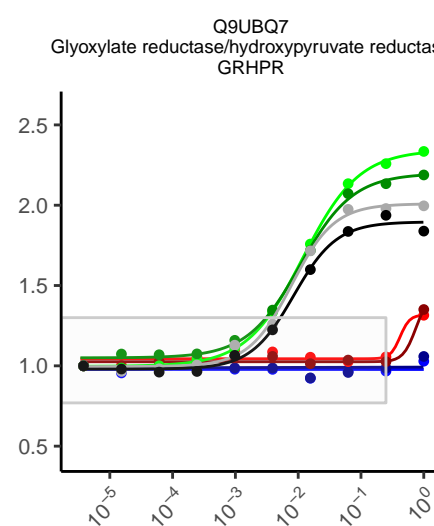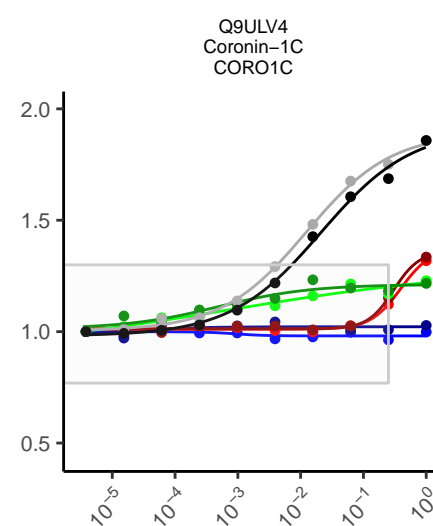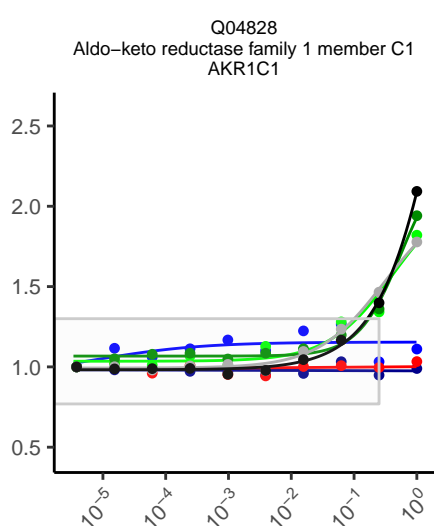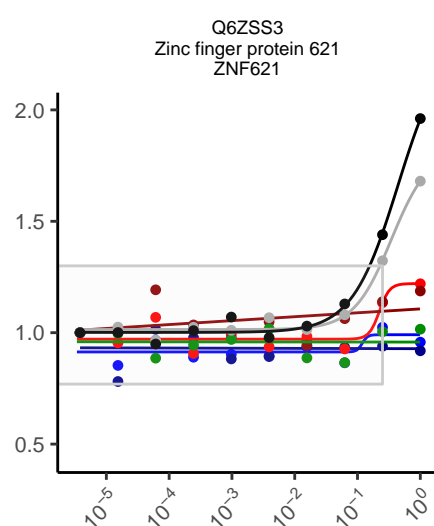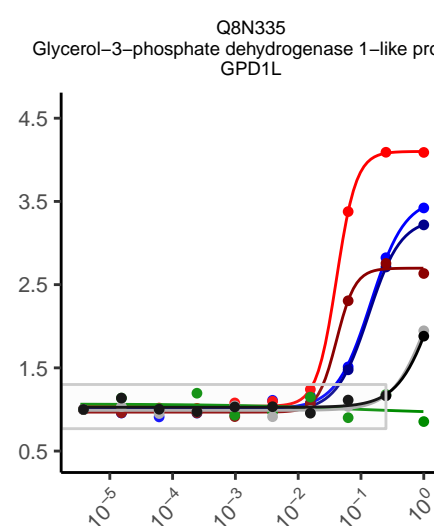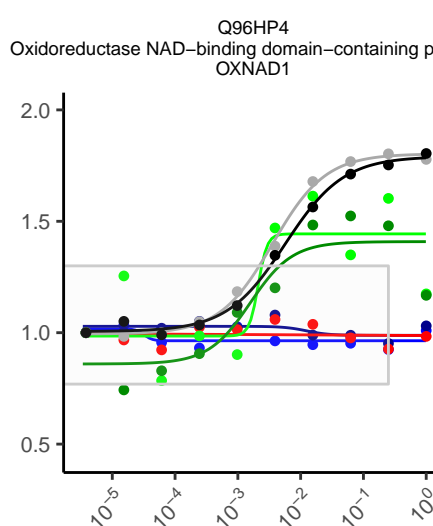

Compound concentration(mM)

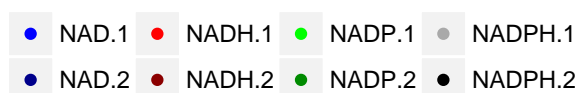

# ITDR CETSA data plotting

Non-denatured protein fraction

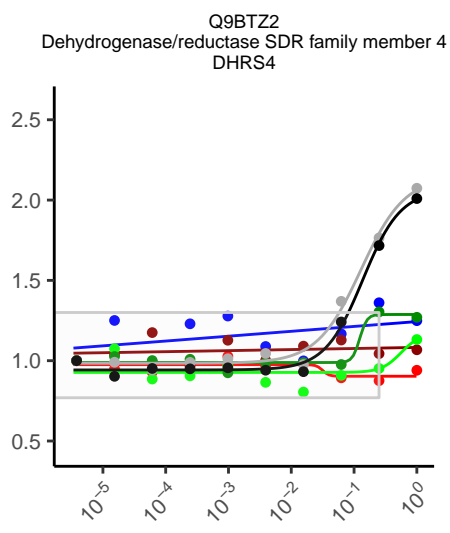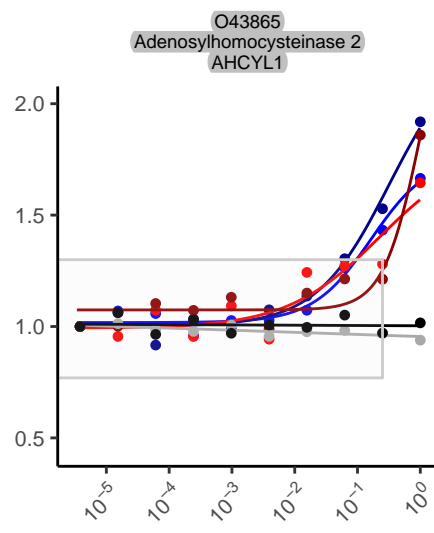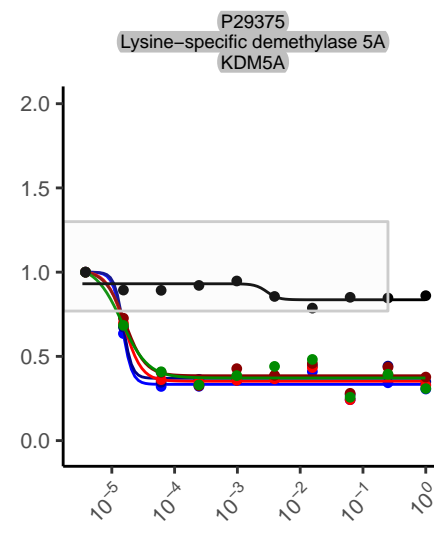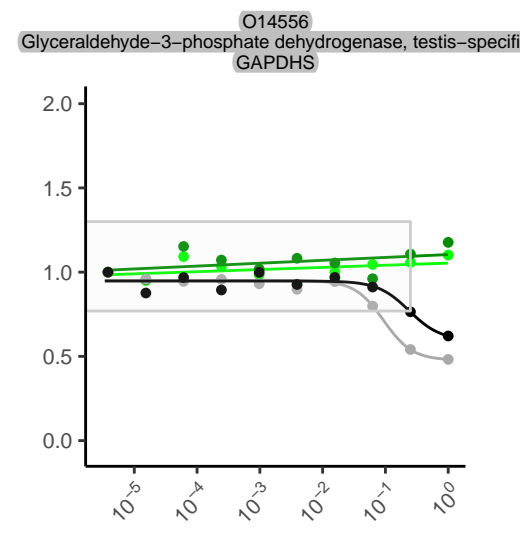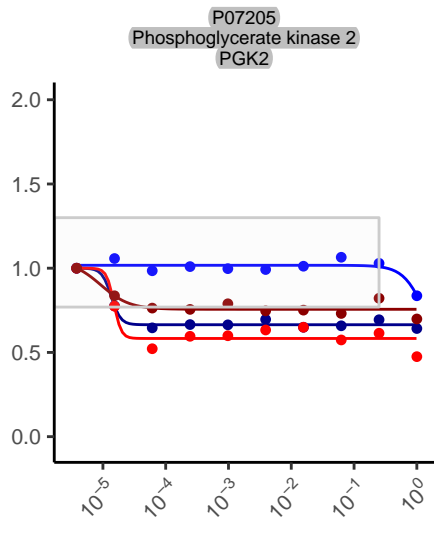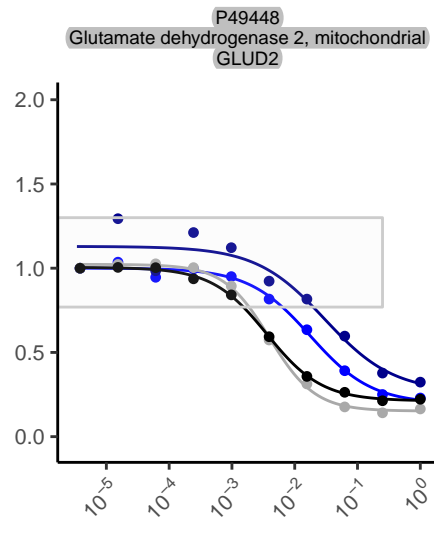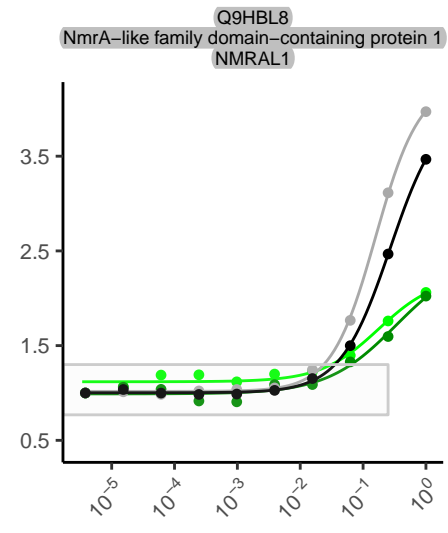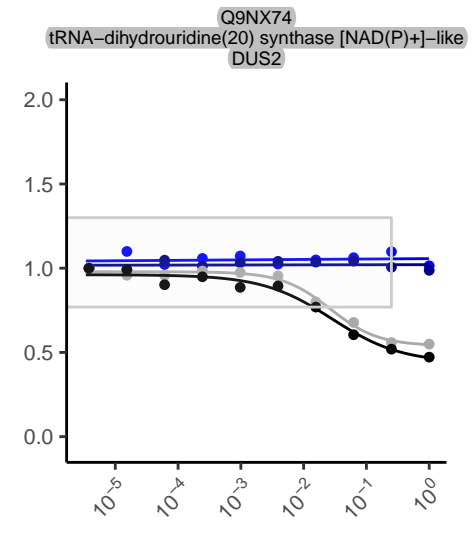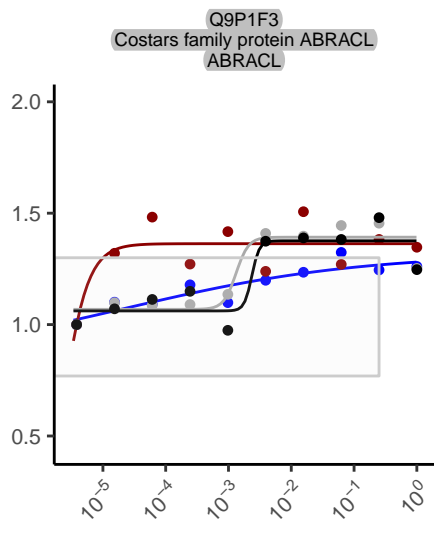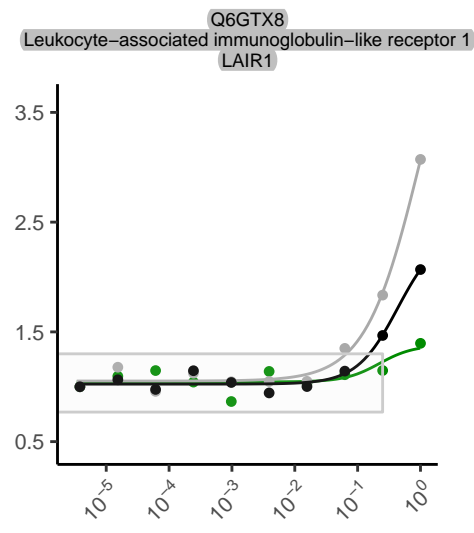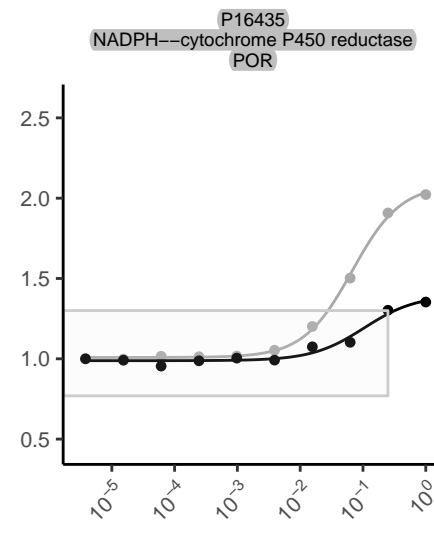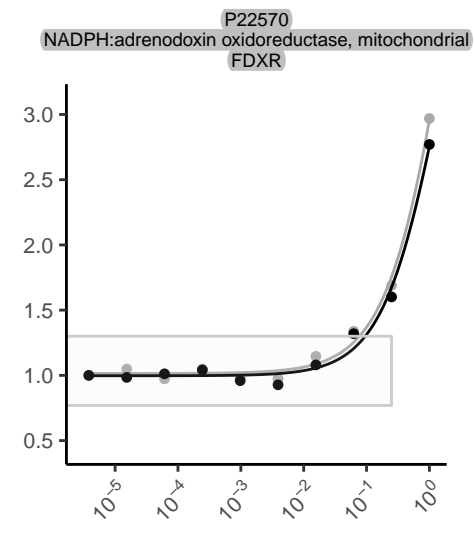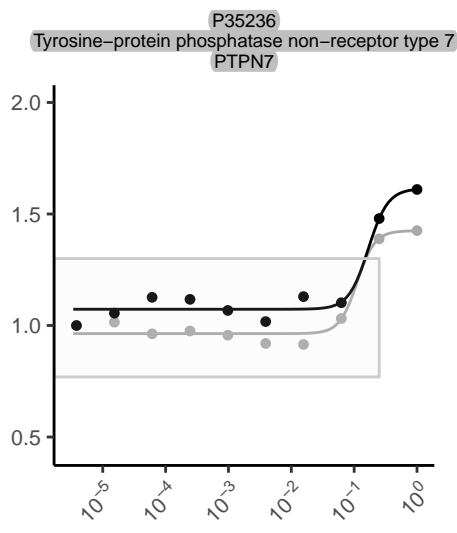

Compound concentration(mM)

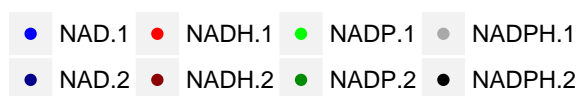

Supplement: pone.0208273.s008.pdf [file pone.0208273.s008.pdf]
