# Supplementary material for: An efficient proteome-wide strategy for discovery and characterization of cellular nucleotide-protein interactions
Source: PubMed Central journal article supplement (PMC6283526; doi:10.1371/journal.pone.0208273), 2018-12-06

CETSA data plotting\_curve fitting

Non-denatured protein fraction

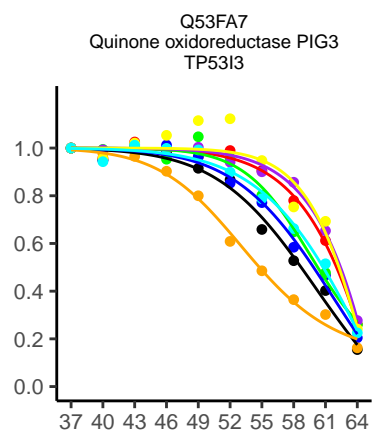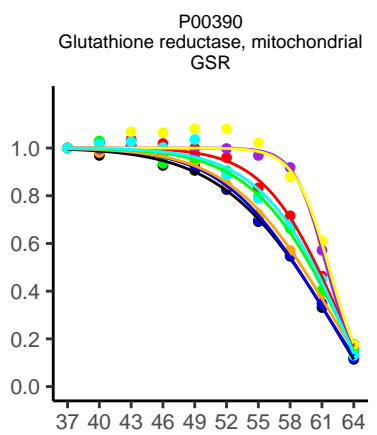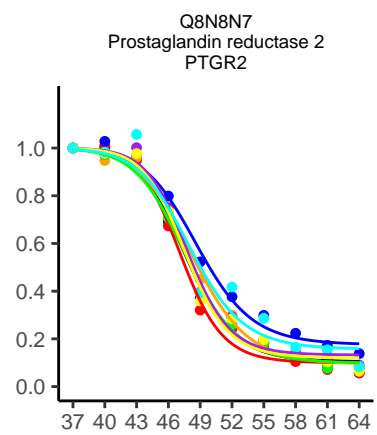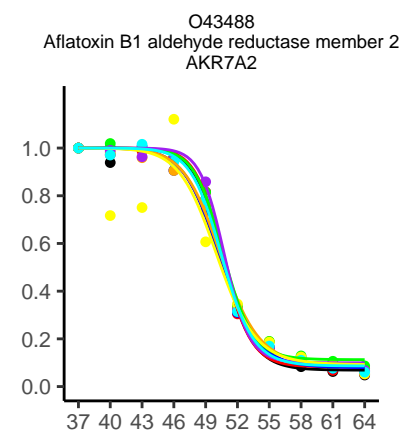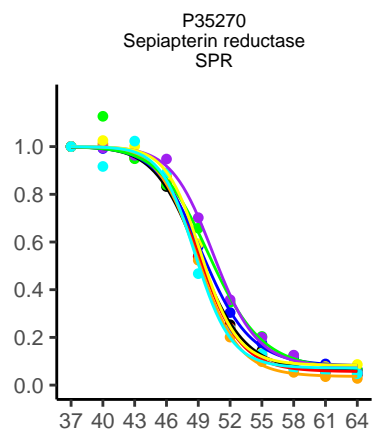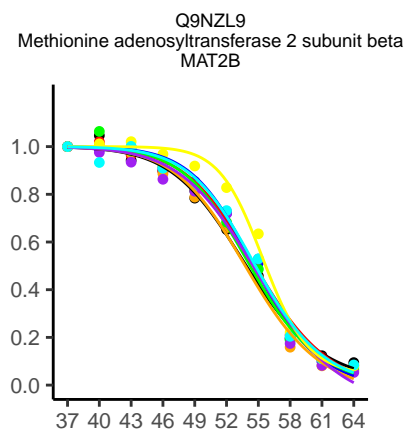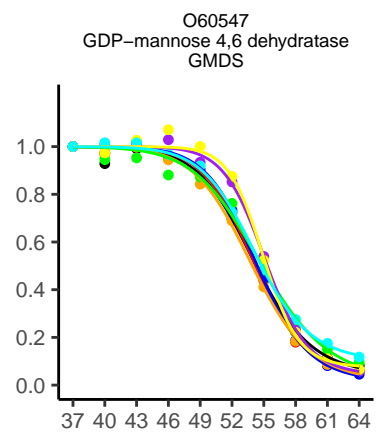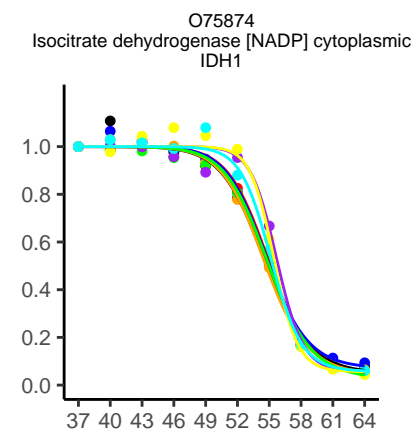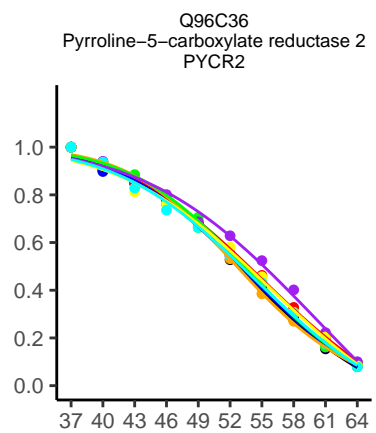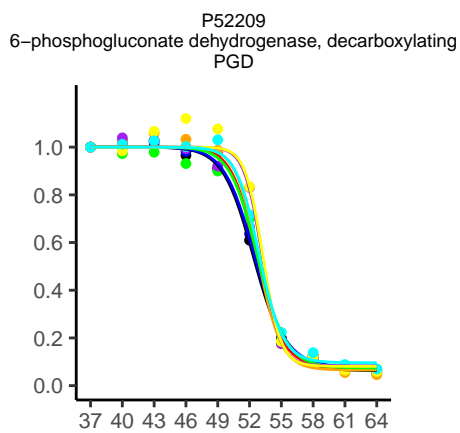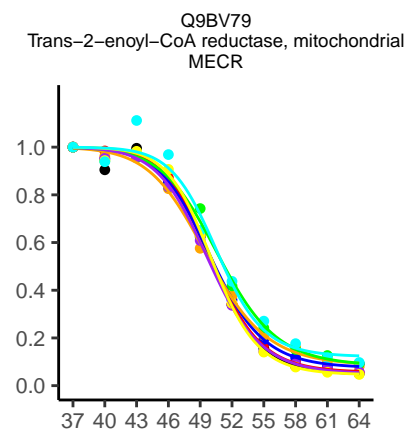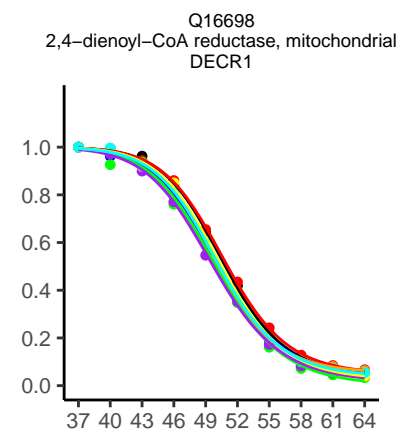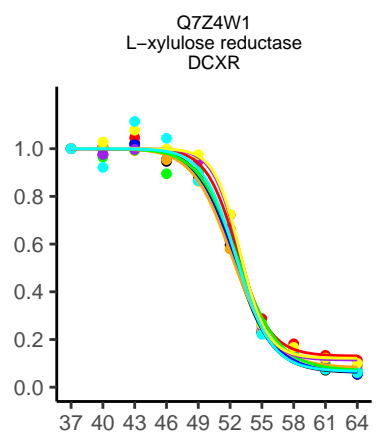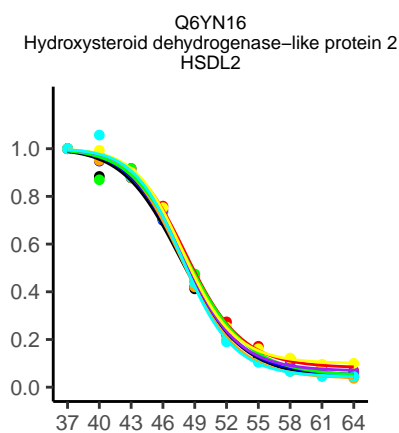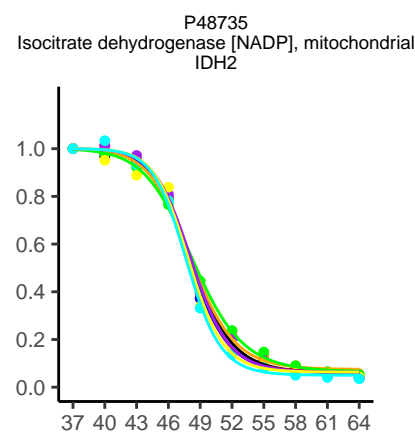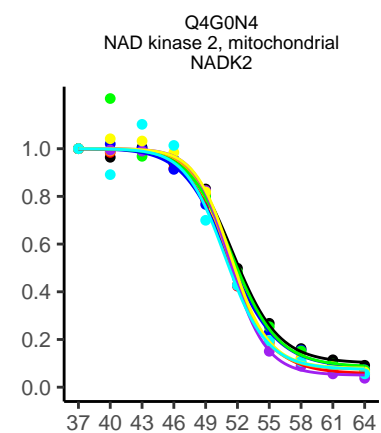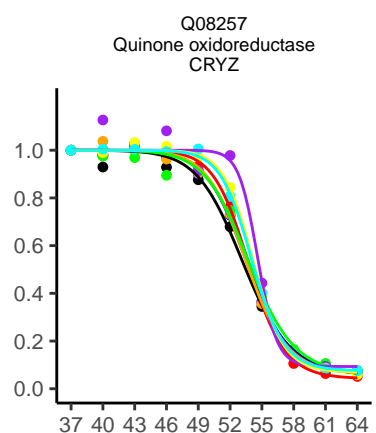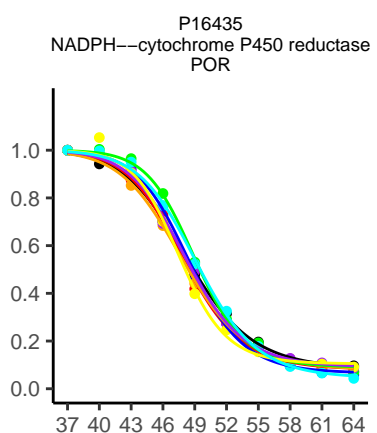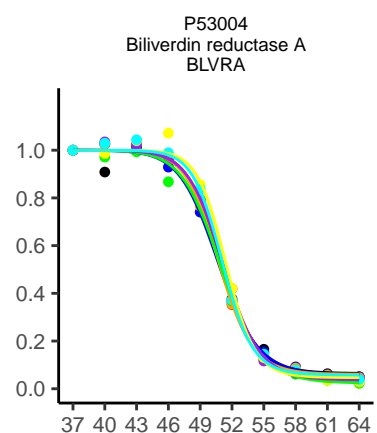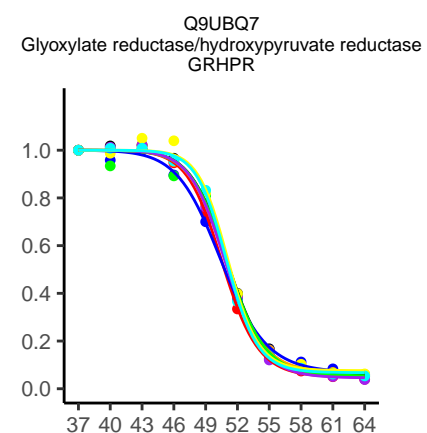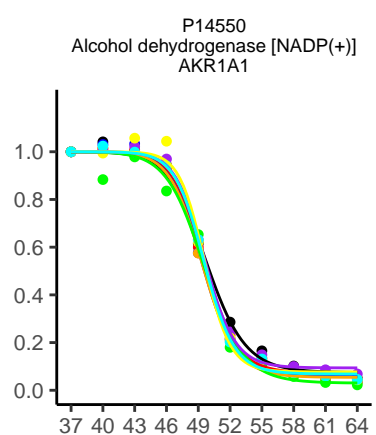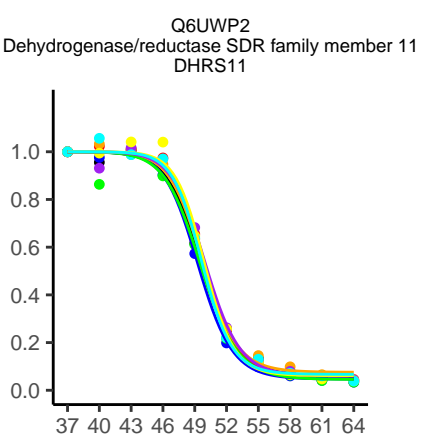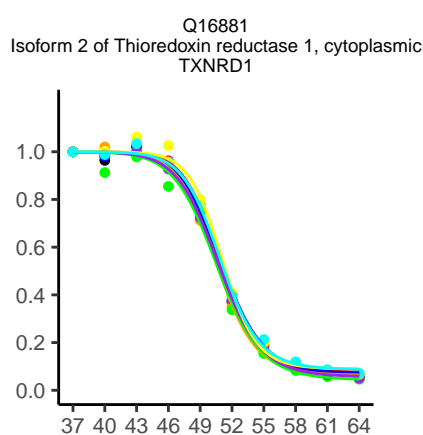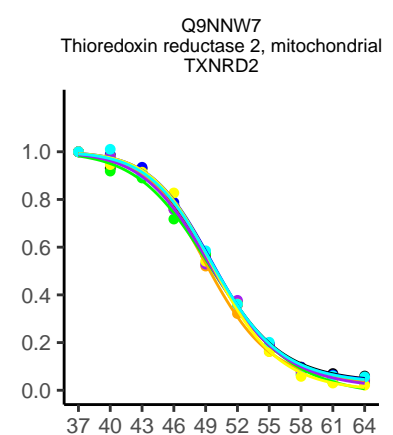

Temperature

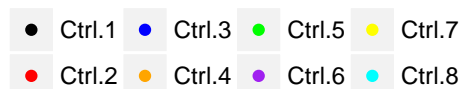

CETSA data plotting\_curve fitting

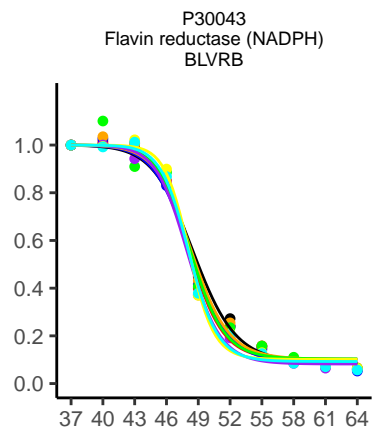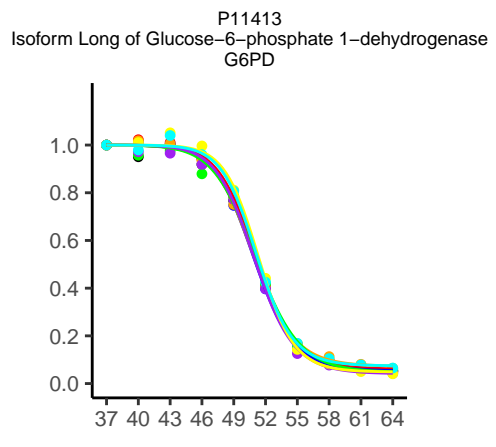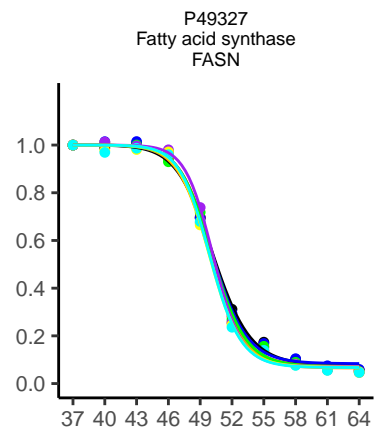

Non-denatured protein fraction

Temperature

- Ctrl.1
- Ctrl.2
- Ctrl.3
- Ctrl.4
- Ctrl.5
- Ctrl.6
- Ctrl.7
- Ctrl.8

CETSA data plotting\_curve fitting

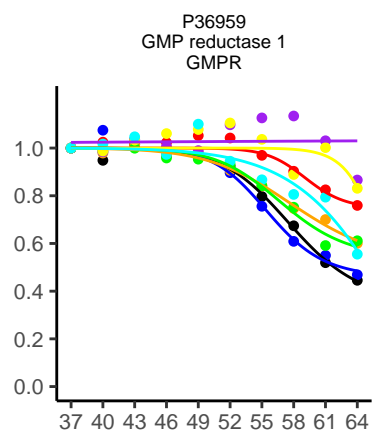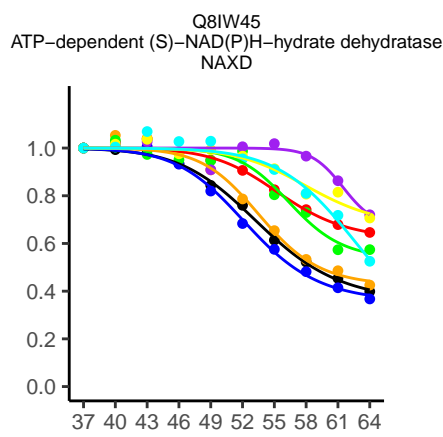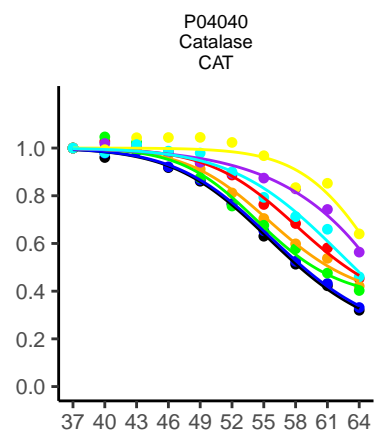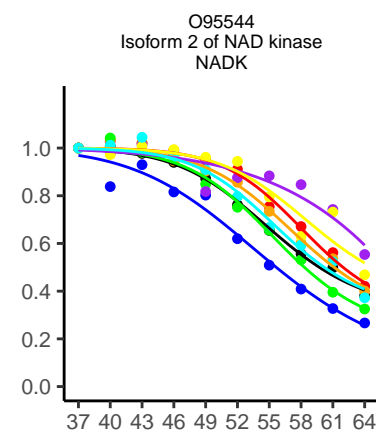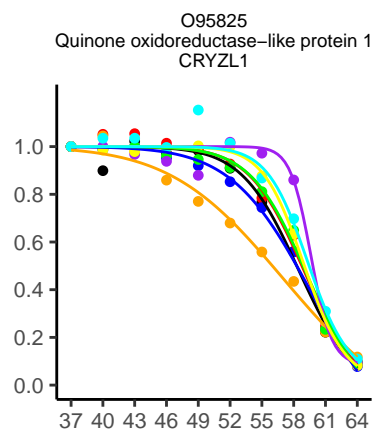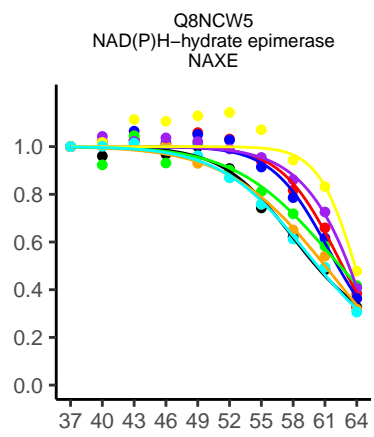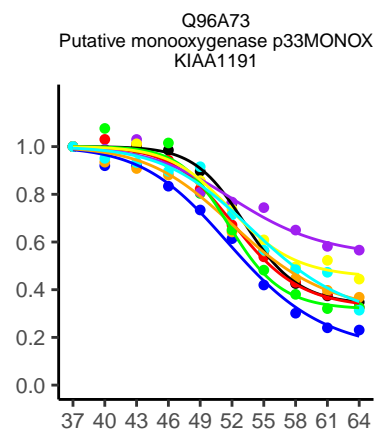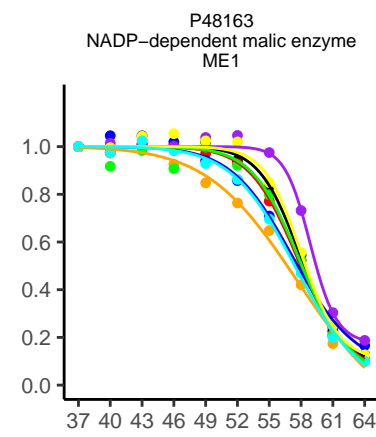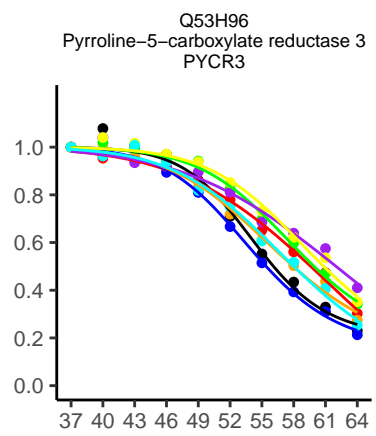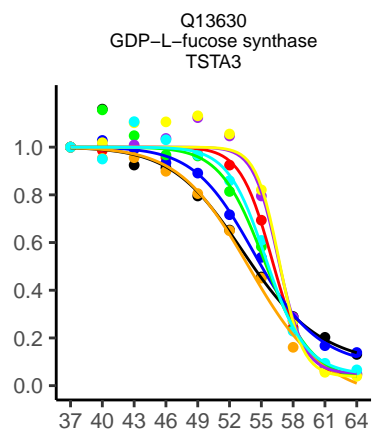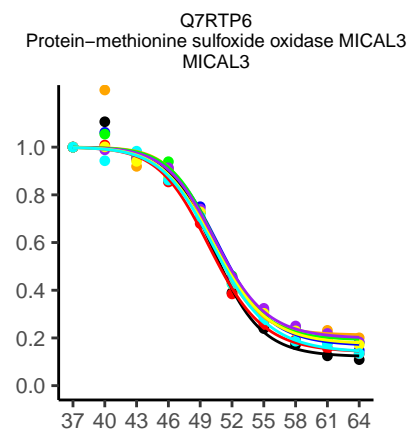

Non-denatured protein fraction

Temperature

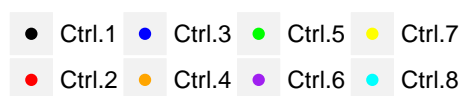

Supplement: pone.0208273.s010.pdf [file pone.0208273.s010.pdf]
