# Supplementary material for: An efficient proteome-wide strategy for discovery and characterization of cellular nucleotide-protein interactions
Source: PubMed Central journal article supplement (PMC6283526; doi:10.1371/journal.pone.0208273), 2018-12-06

# ITDR CETSA data plotting

Non-denatured protein fraction

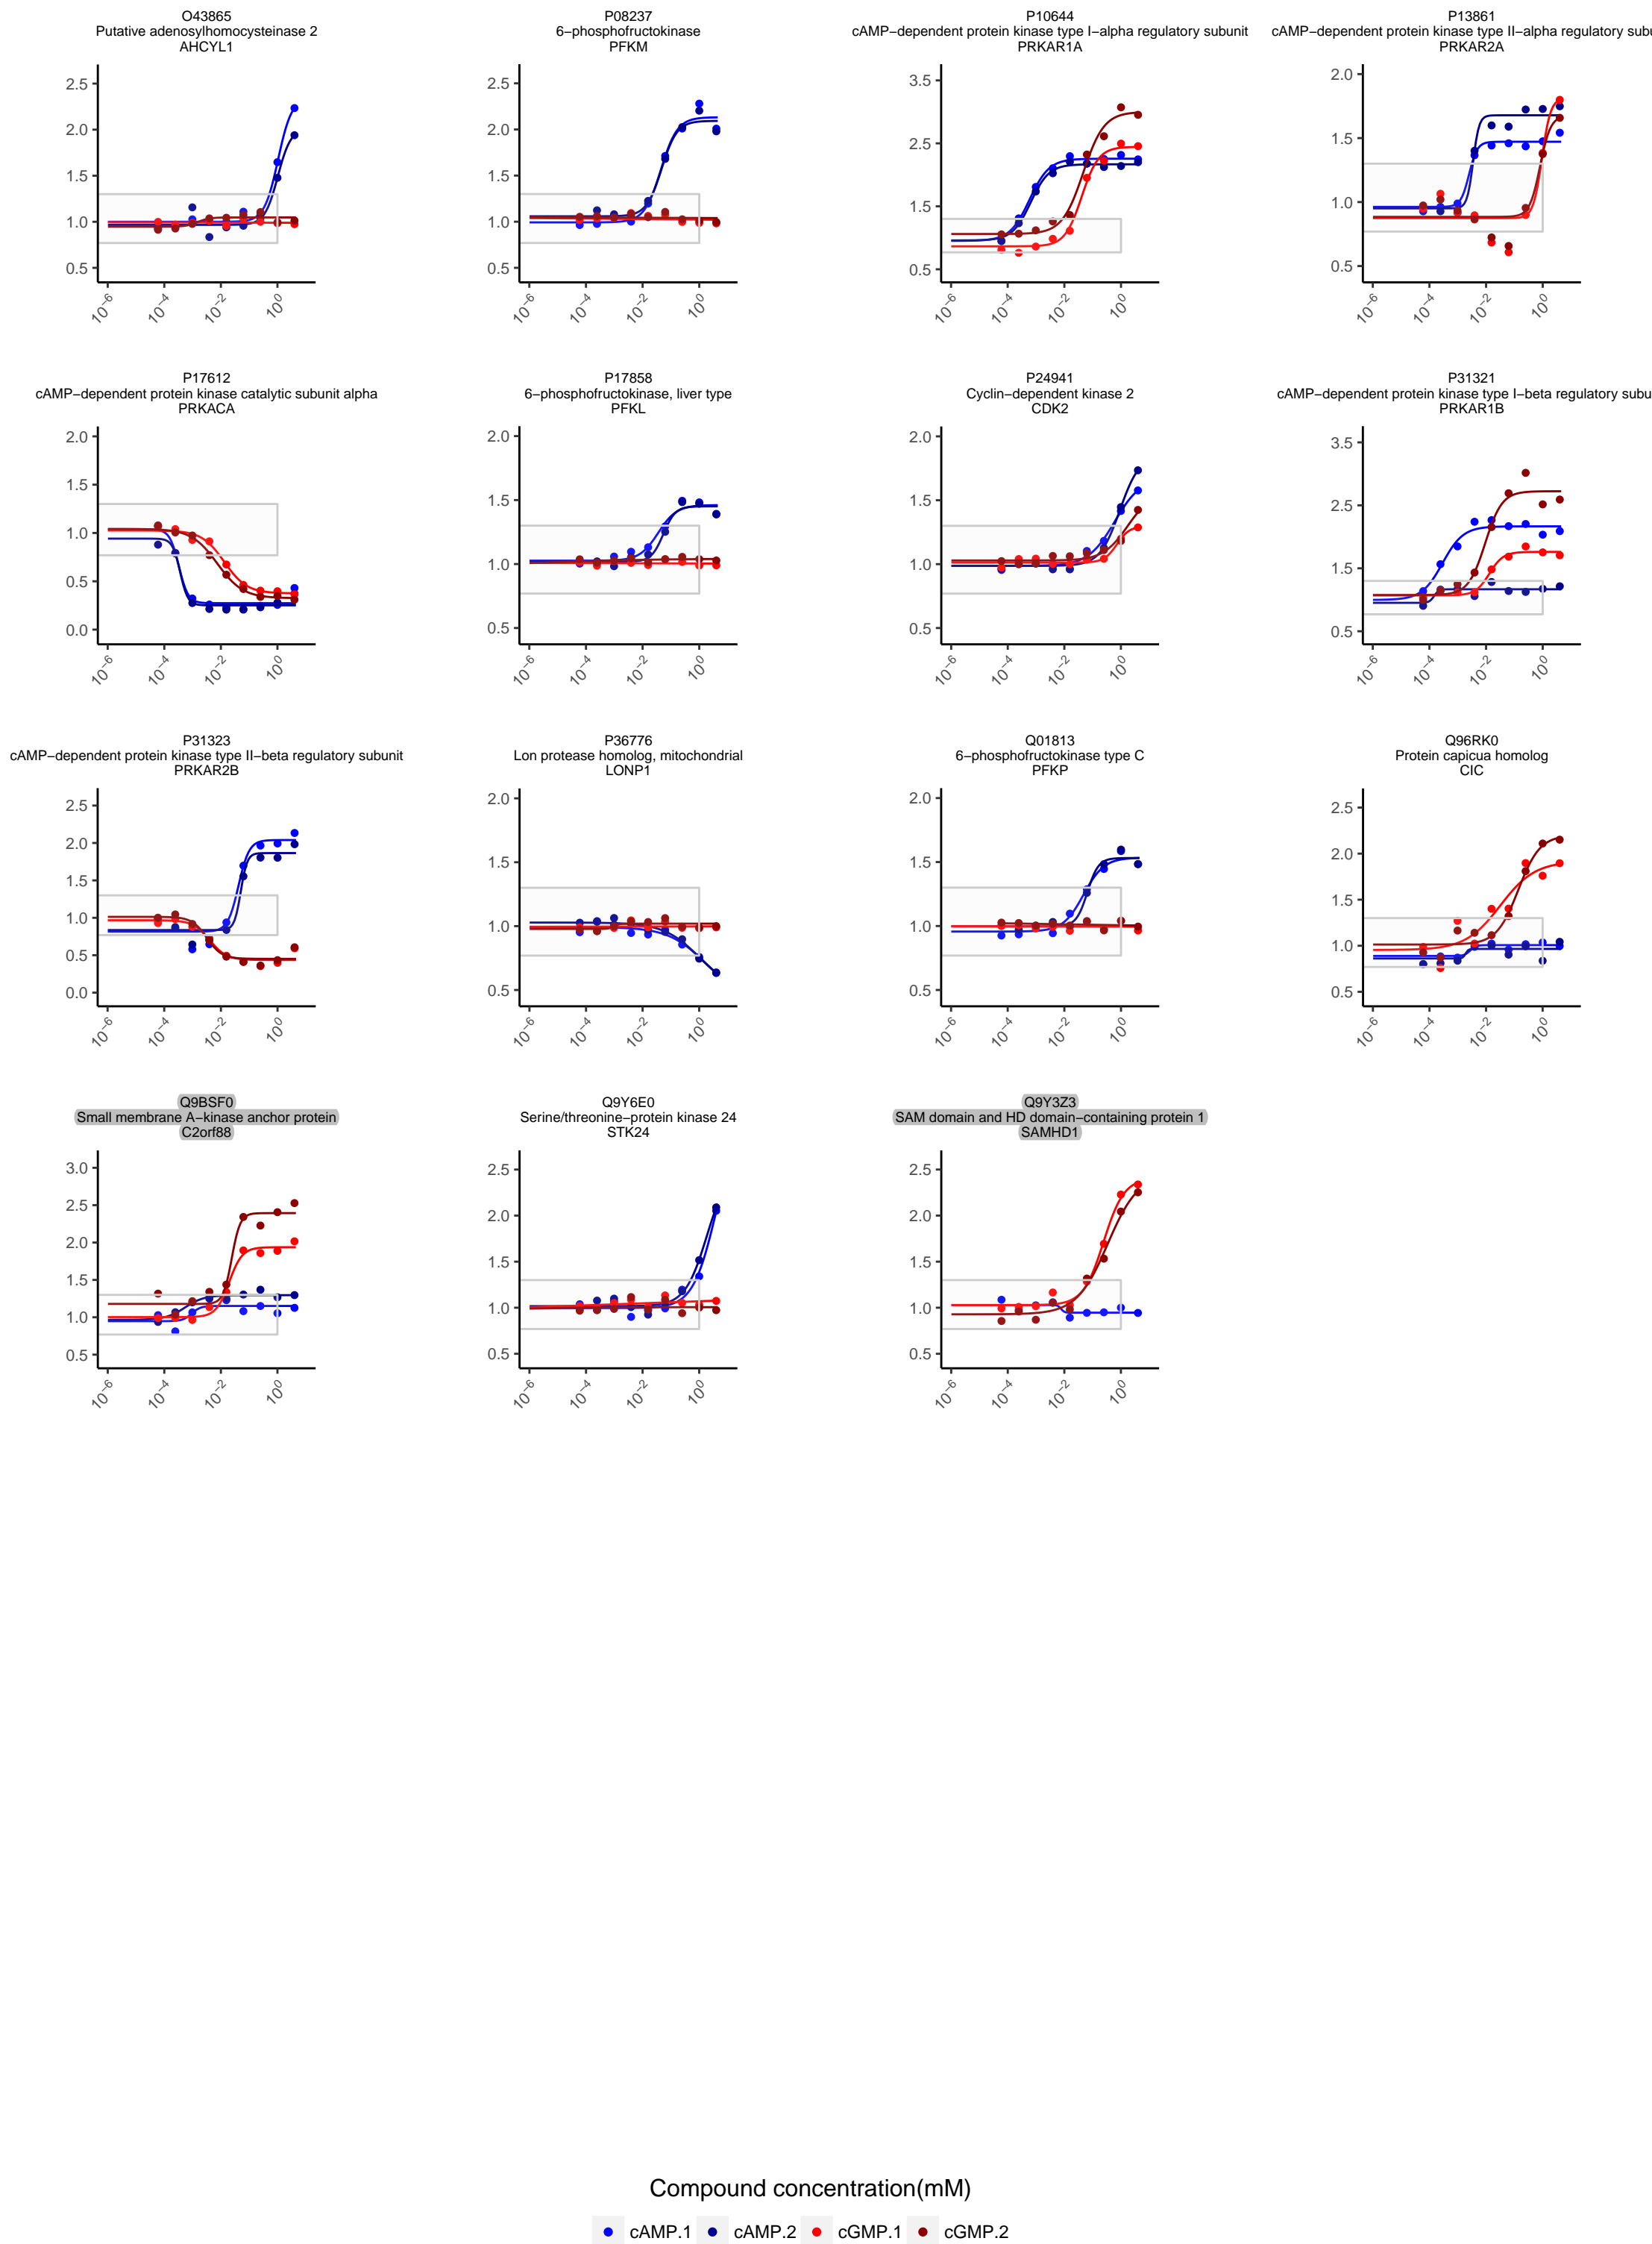

Supplement: pone.0208273.s004.pdf [file pone.0208273.s004.pdf]
