# Supplementary material for: An efficient proteome-wide strategy for discovery and characterization of cellular nucleotide-protein interactions
Source: PubMed Central journal article supplement (PMC6283526; doi:10.1371/journal.pone.0208273), 2018-12-06
Supplement: pone.0208273.s005.pdf [file pone.0208273.s005.pdf]

CETSA data plotting\_curve fitting

Non-denatured protein fraction

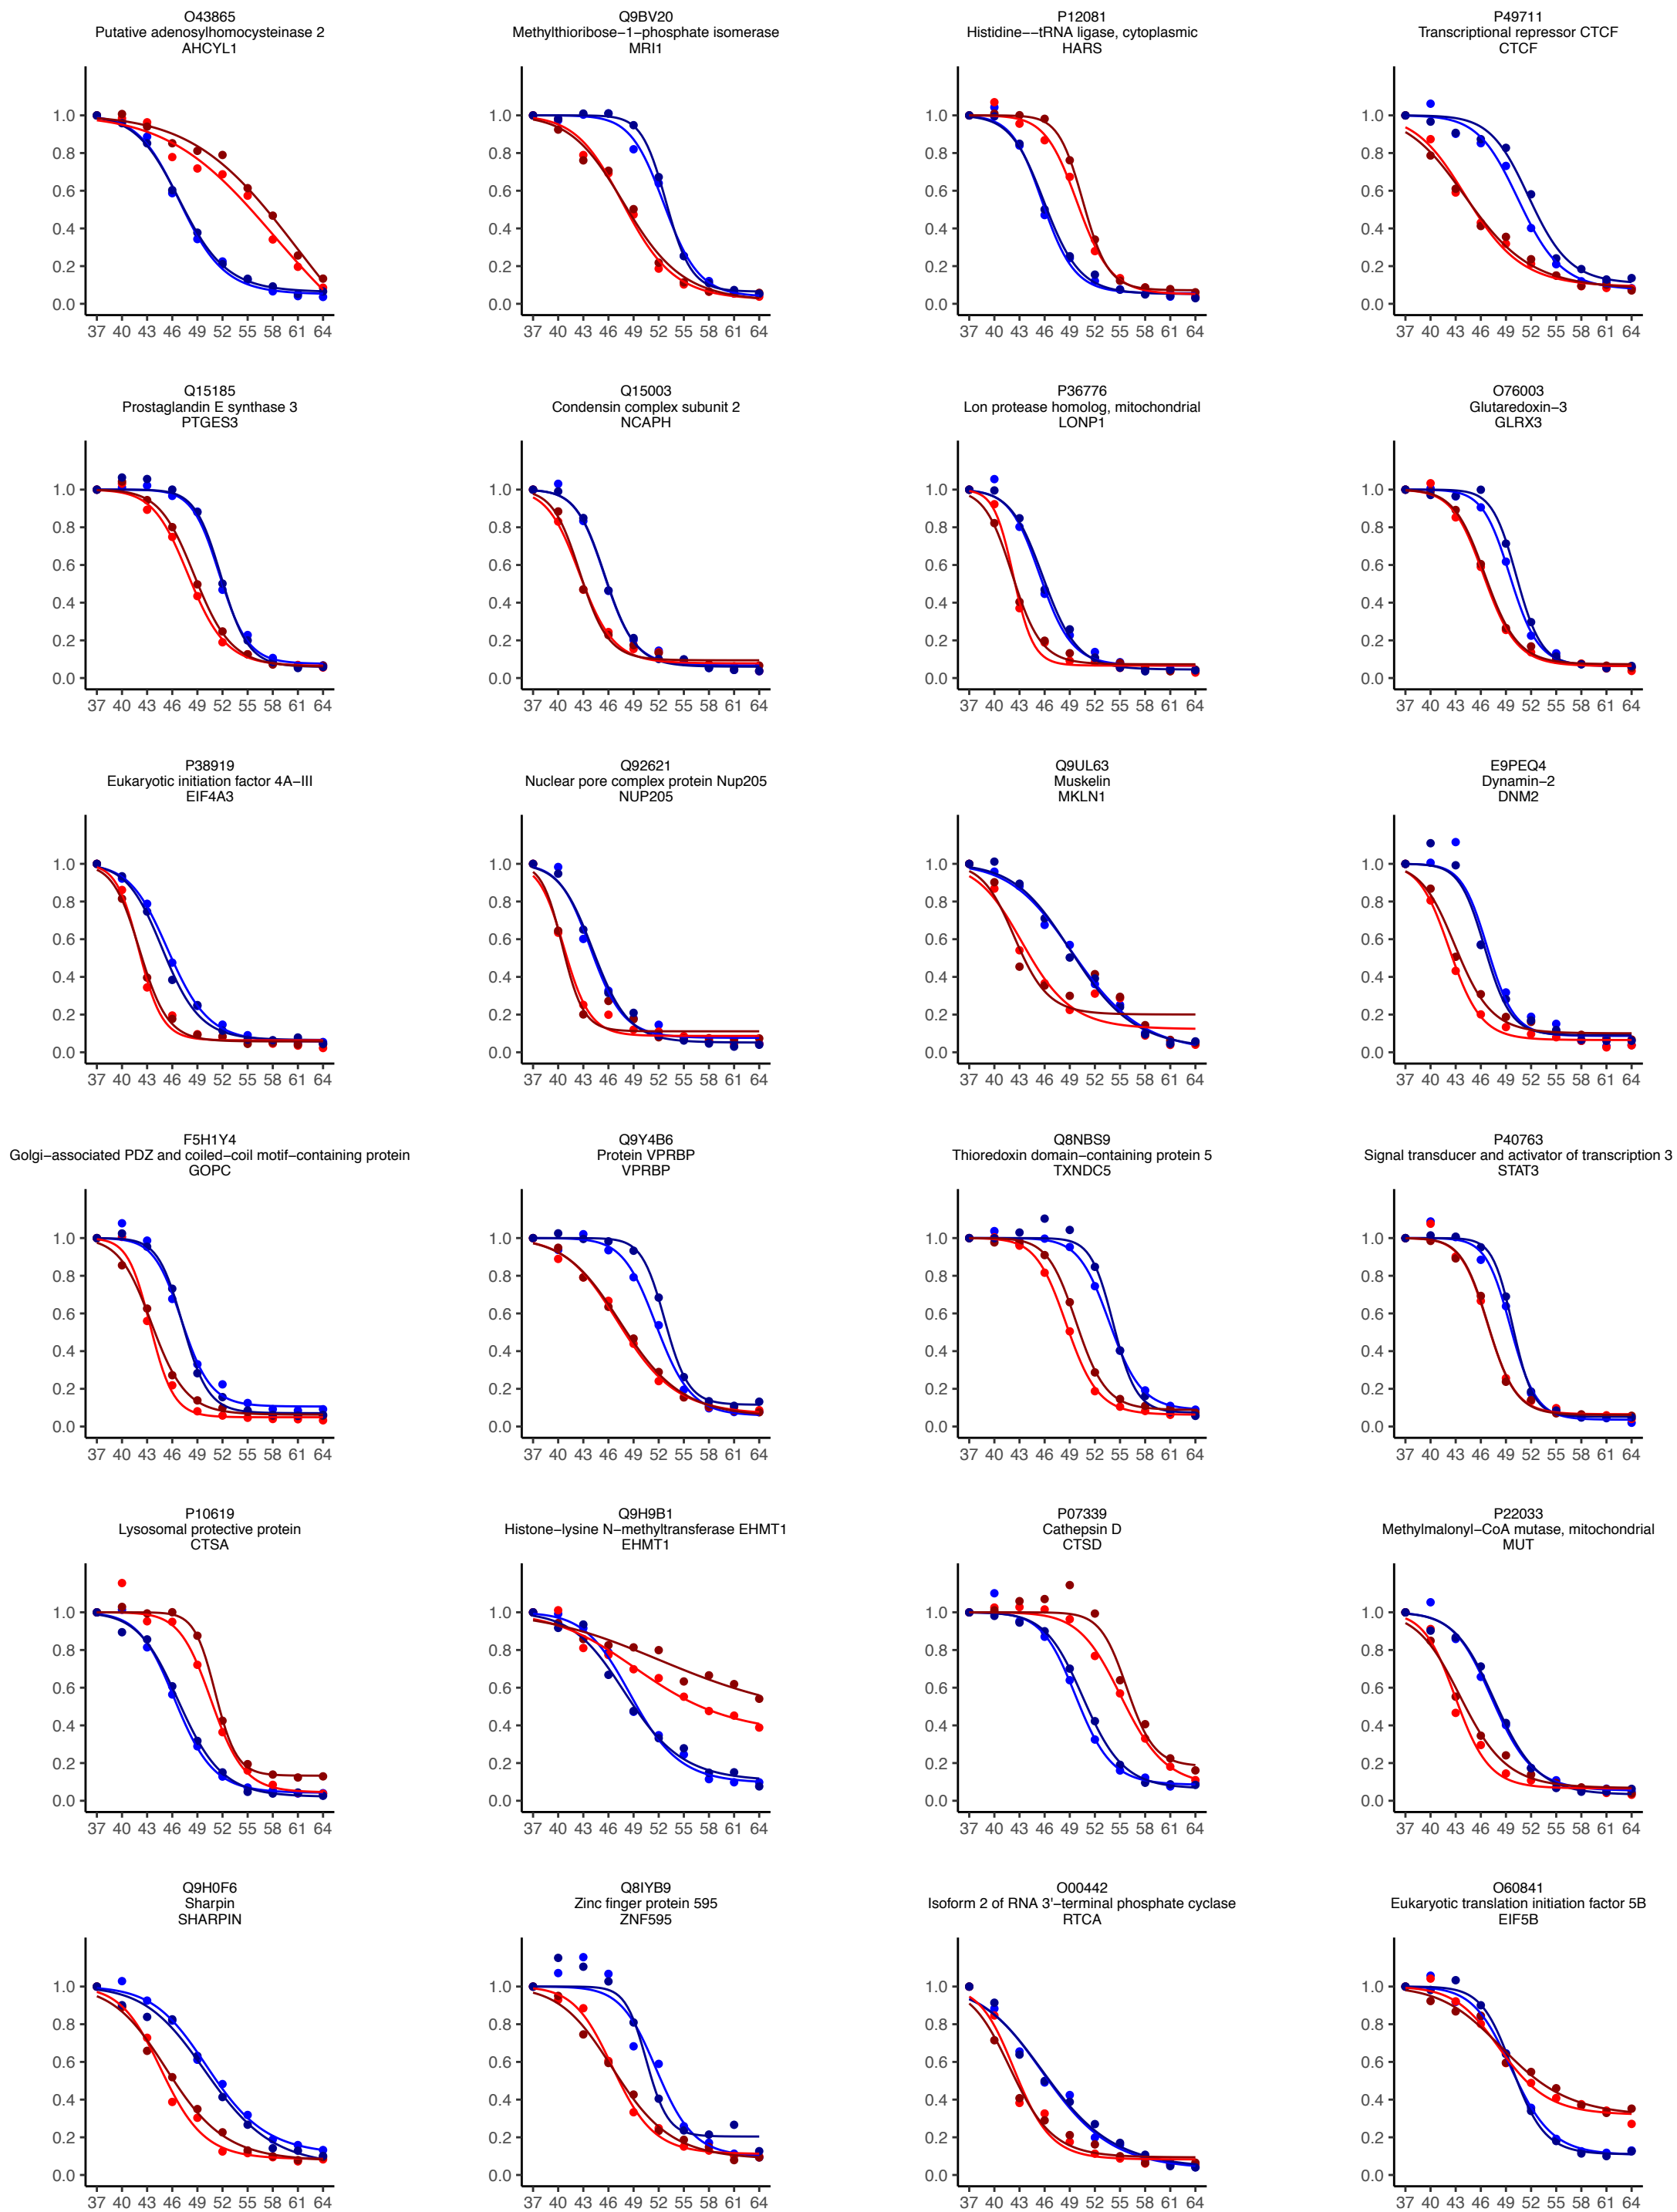

Temperature

● pH7.5 rep1 ● pH7.5 rep2 ● pH6.5 rep1 ● pH6.5 rep2

CETSA data plotting\_curve fitting

Non-denatured protein fraction

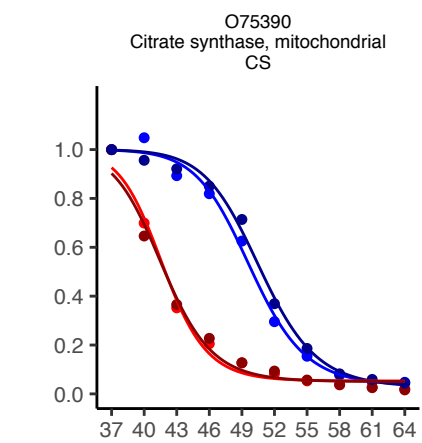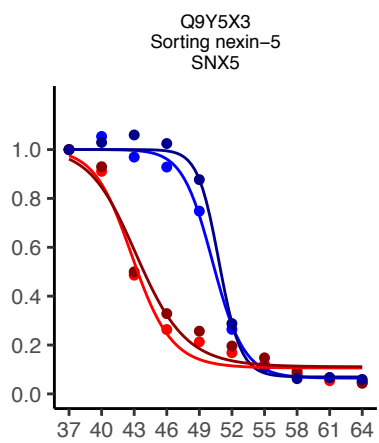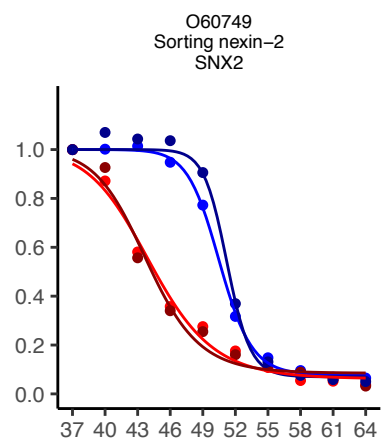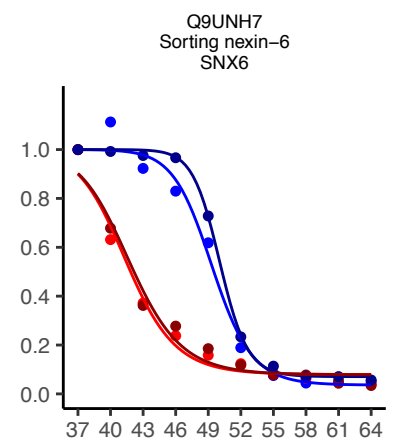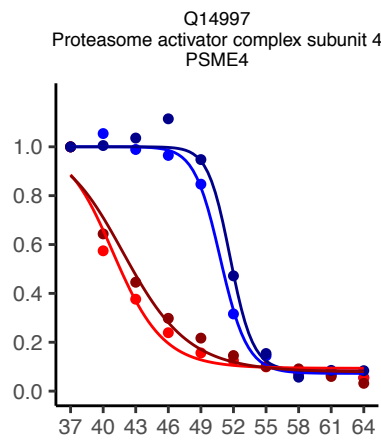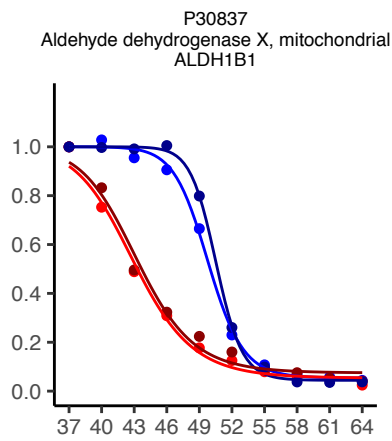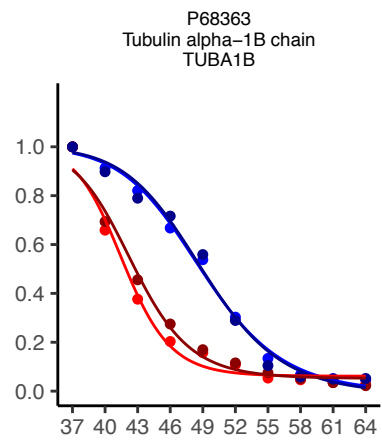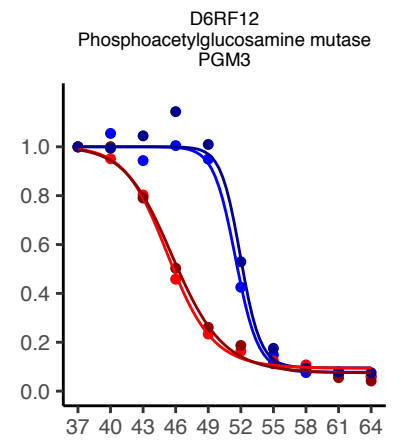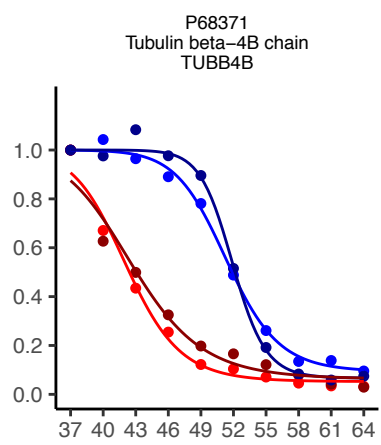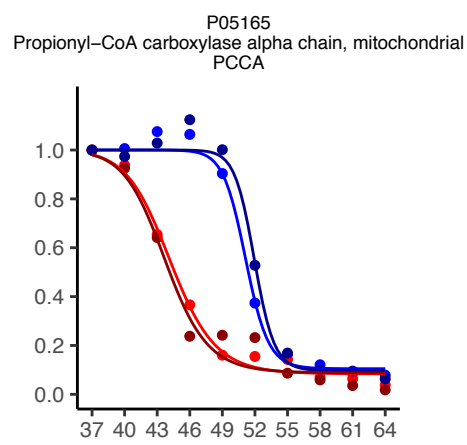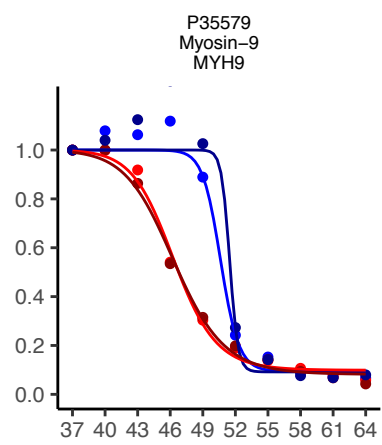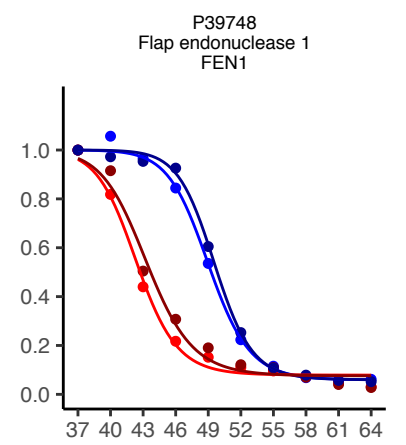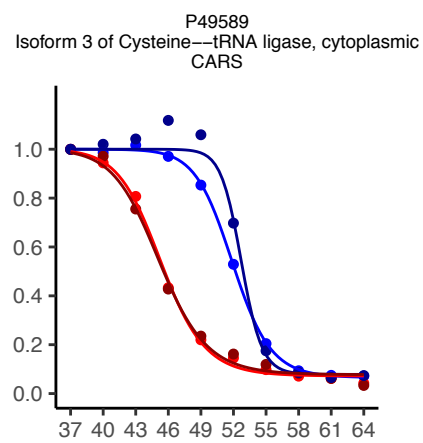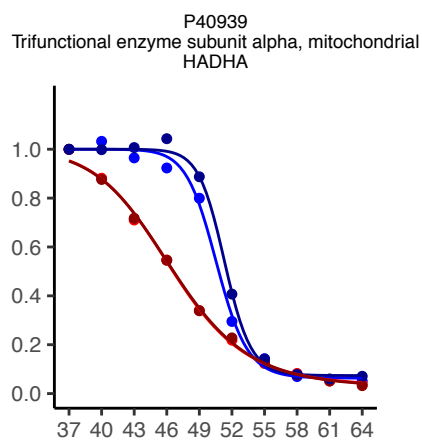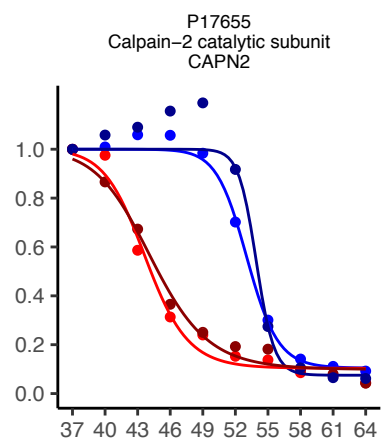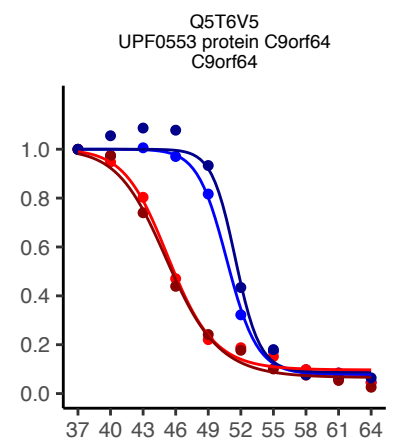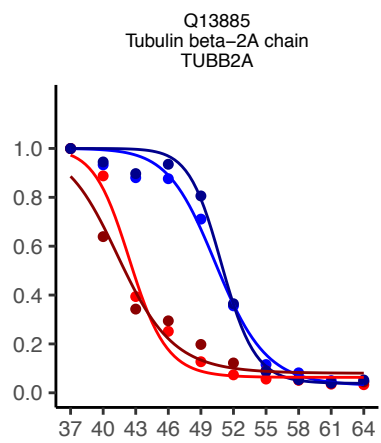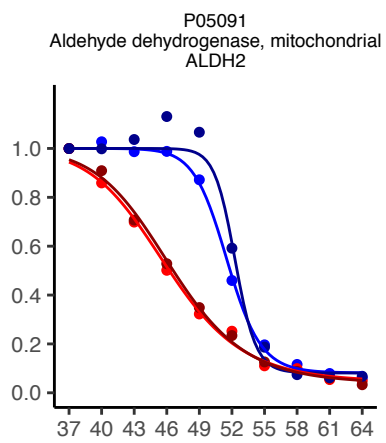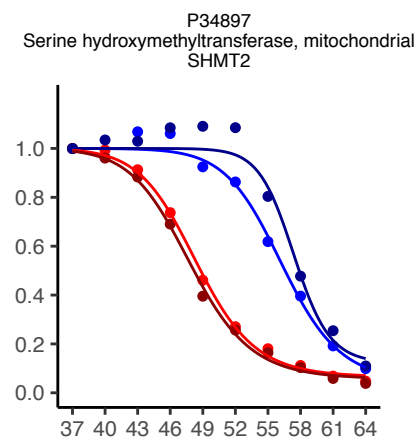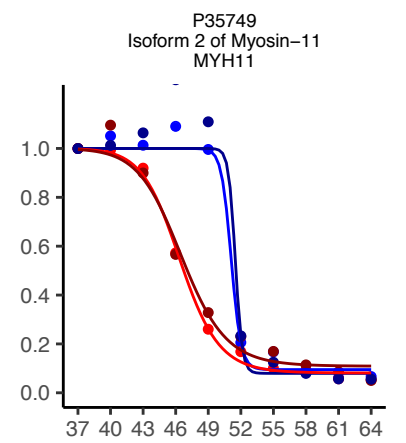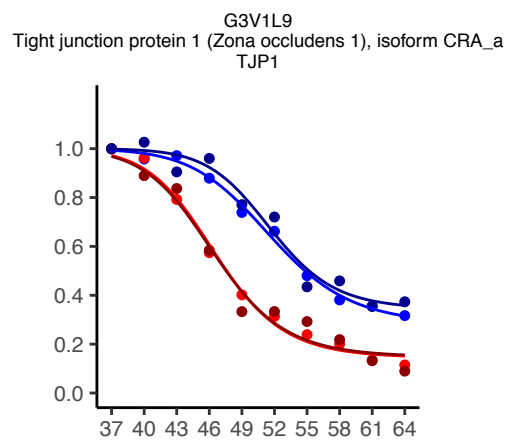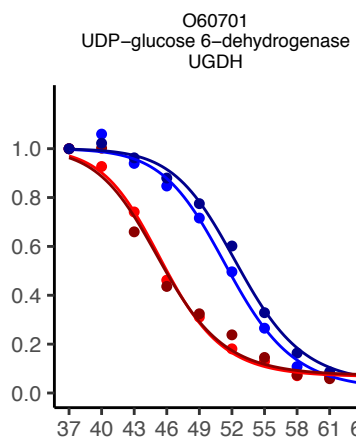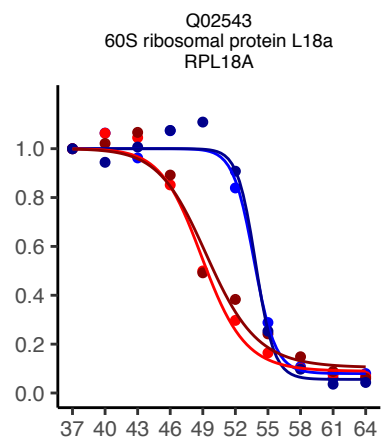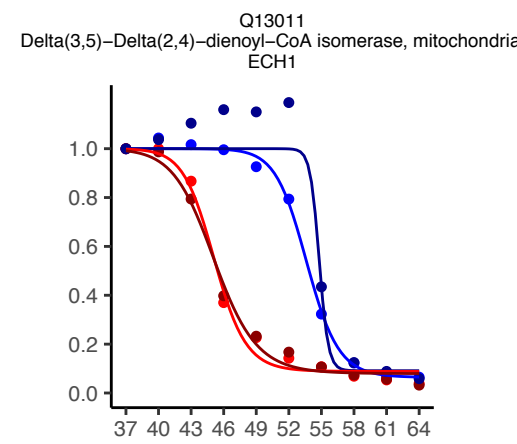

Temperature

● pH7.5 rep1 ● pH7.5 rep2 ● pH8.5 rep1 ● pH8.5 rep2
