# Supplementary material for: An efficient proteome-wide strategy for discovery and characterization of cellular nucleotide-protein interactions
Source: PubMed Central journal article supplement (PMC6283526; doi:10.1371/journal.pone.0208273), 2018-12-06
Supplement: pone.0208273.s006.pdf [file pone.0208273.s006.pdf]

CETSA data plotting\_curve fitting

Non-denatured protein fraction

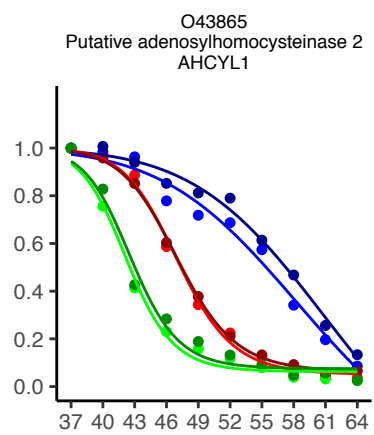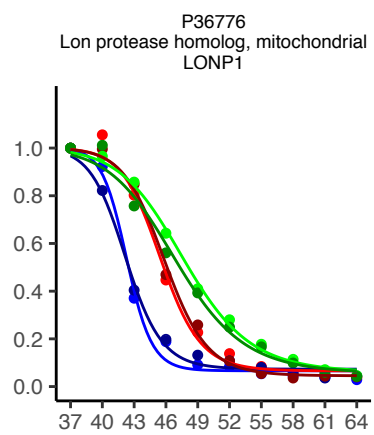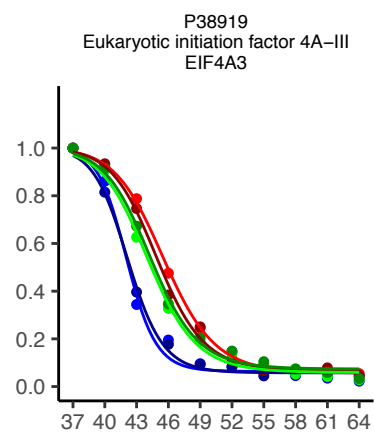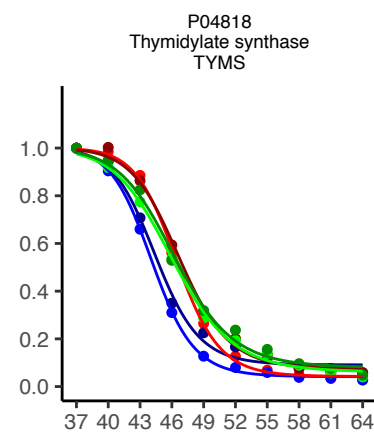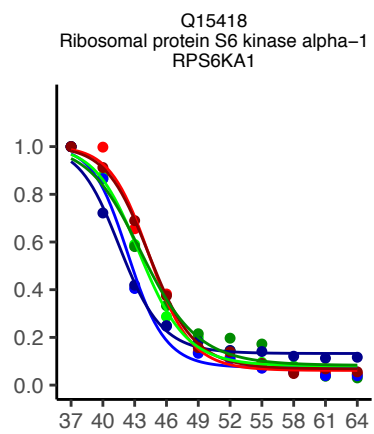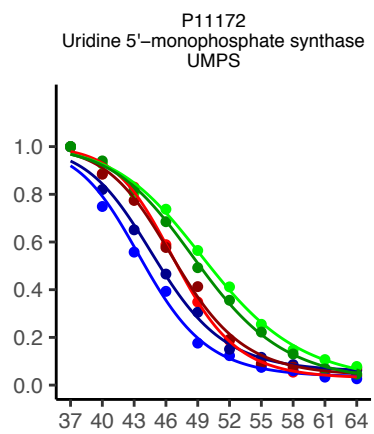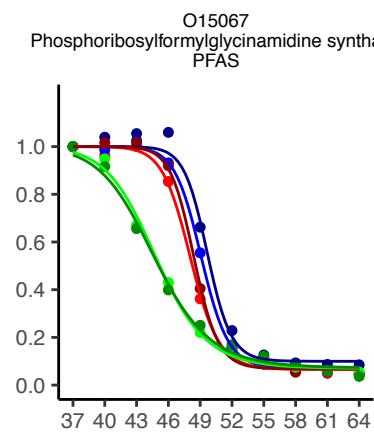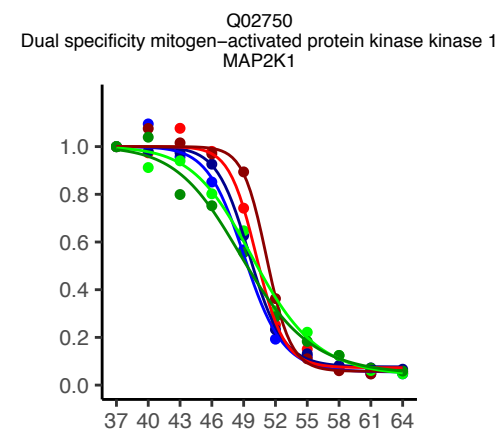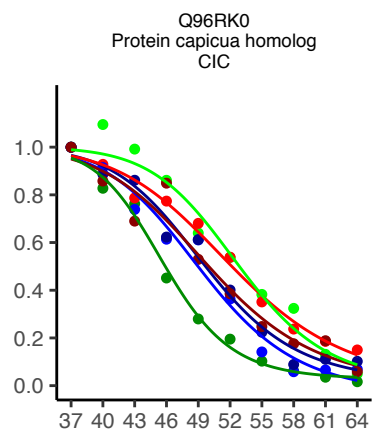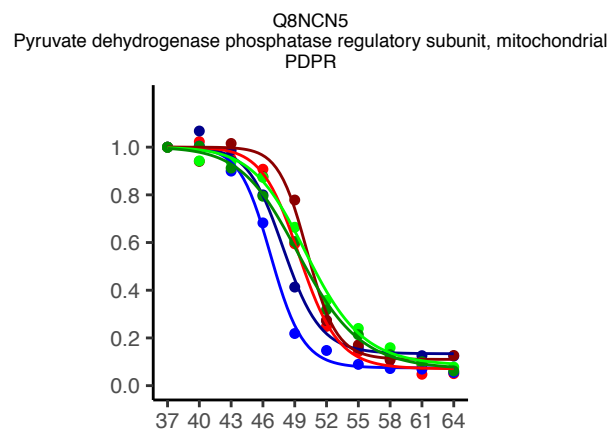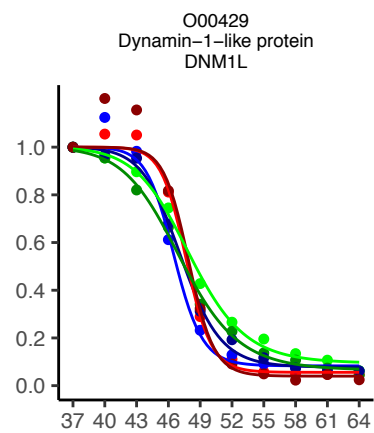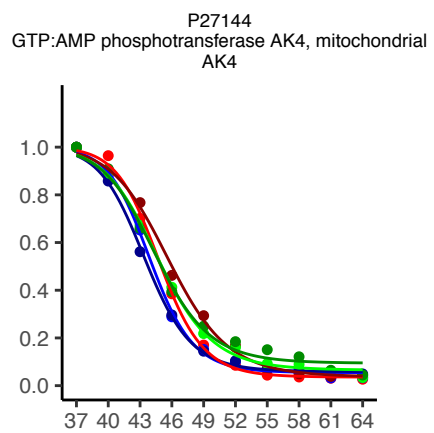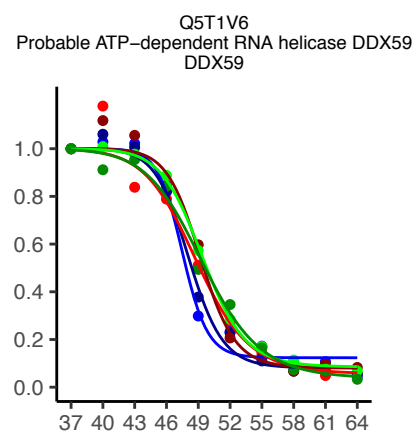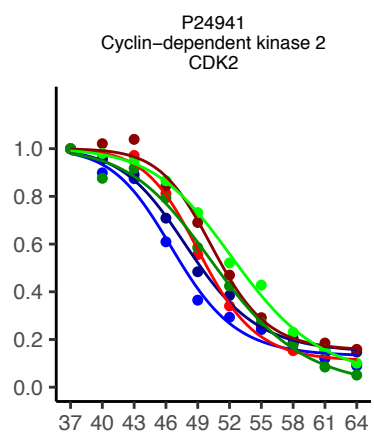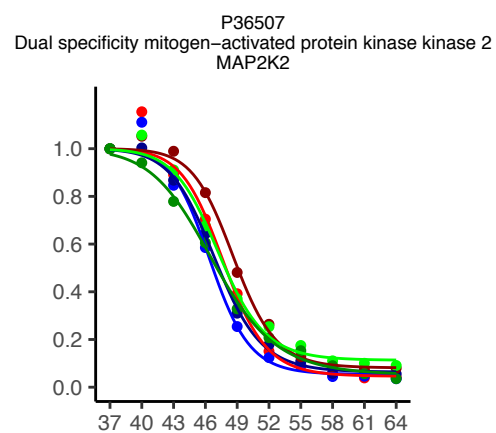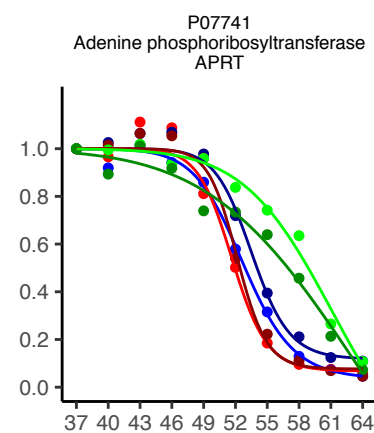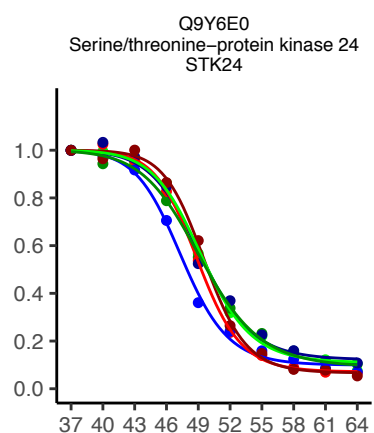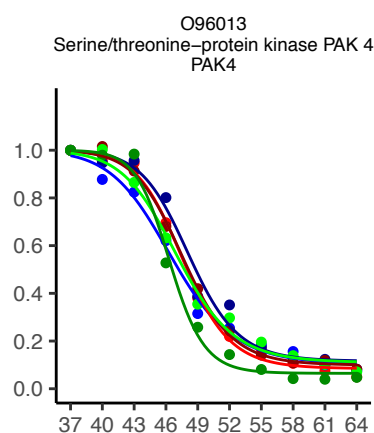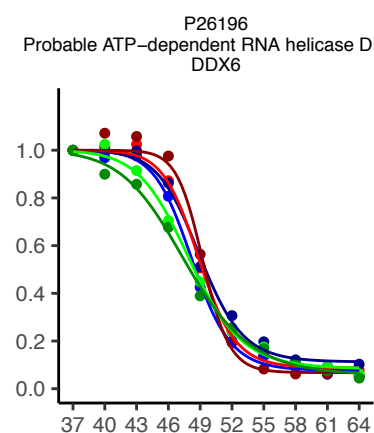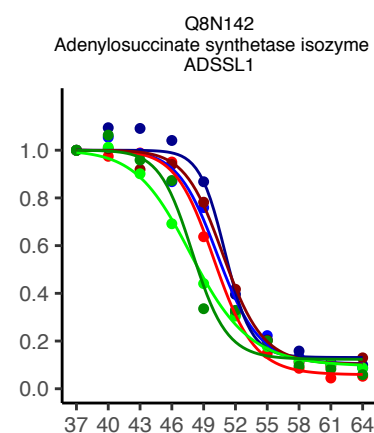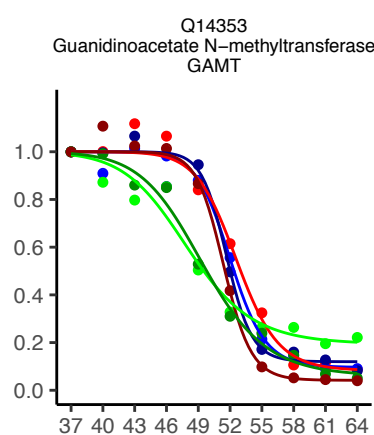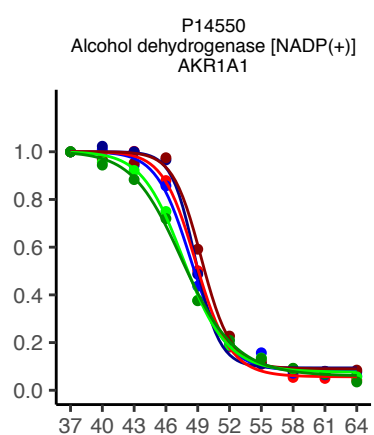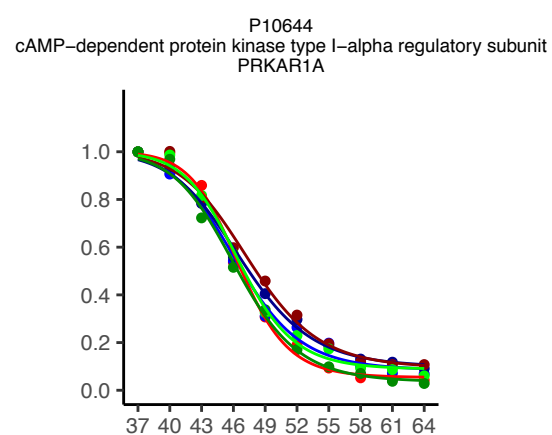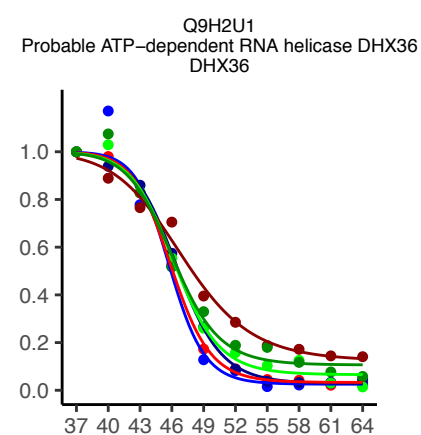

Temperature

- pH6.5 rep1
- pH7.5 rep1
- pH8.5 rep1
- pH6.5 rep2
- pH7.5 rep2
- pH8.5 rep2

CETSA data plotting\_curve fitting

P21980  
Protein-glutamine gamma-glutamyltransferase 2  
TGM2

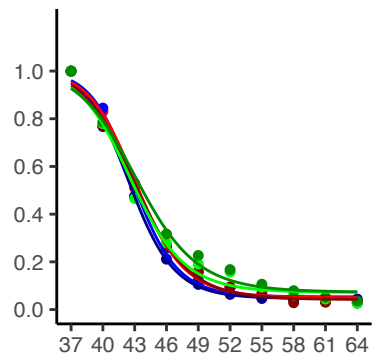

Q9Y6Y0  
Influenza virus NS1A-binding protein  
IVNS1ABP

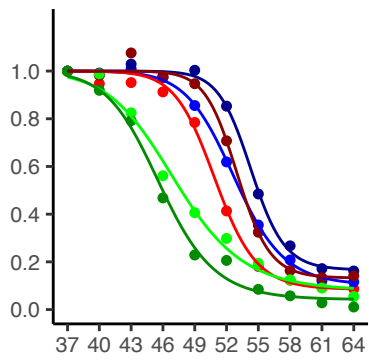

P13861  
cAMP-dependent protein kinase type II-alpha regulatory subunit  
PRKAR2A

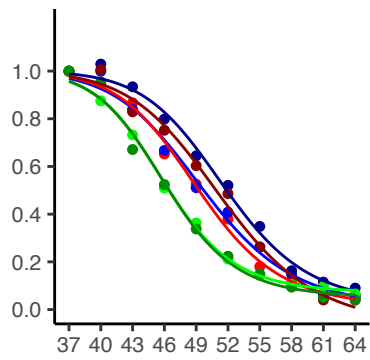

P31323  
cAMP-dependent protein kinase type II-beta regulatory subunit  
PRKAR2B

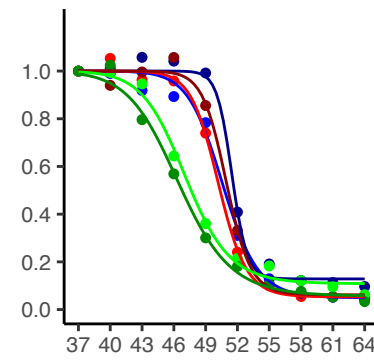

P27707  
Deoxycytidine kinase  
DCK

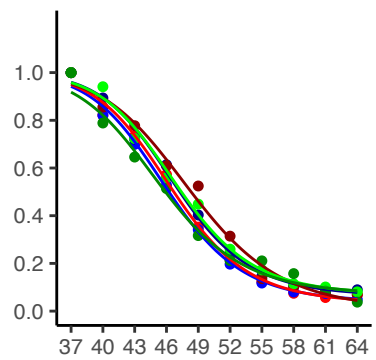

Q92900  
Regulator of nonsense transcripts 1  
UPF1

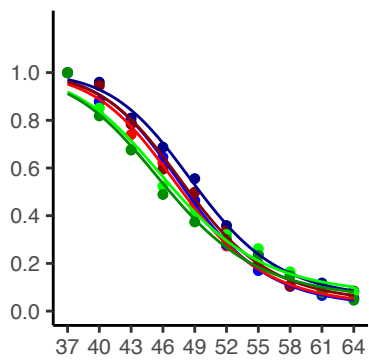

P17858  
6-phosphofructokinase, liver type  
PFKL

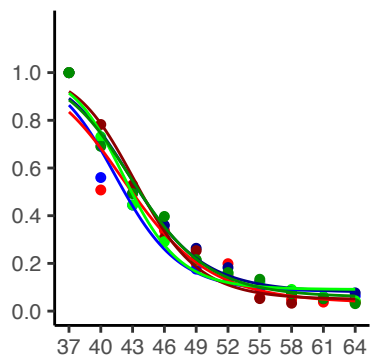

P17612  
cAMP-dependent protein kinase catalytic subunit alpha  
PRKACA

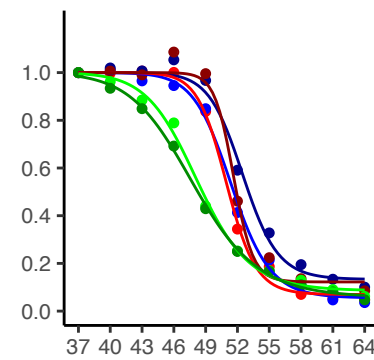

P14618  
Pyruvate kinase isozymes M1/M2  
PKM

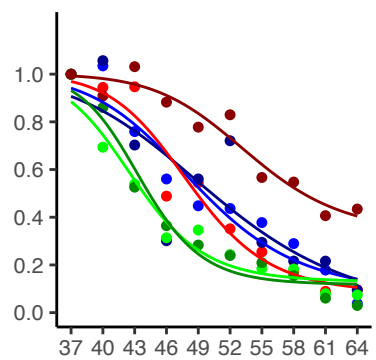

P33316  
Deoxyuridine 5'-triphosphate nucleotidohydrolase, mitochondrial  
DUT

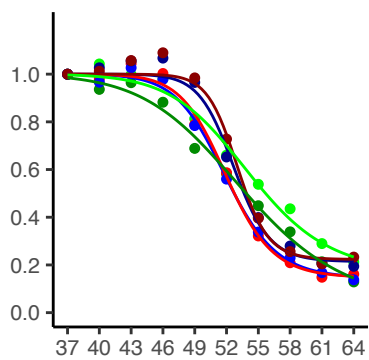

Non-denatured protein fraction

Temperature

- pH6.5 rep1
- pH7.5 rep1
- pH8.5 rep1
- pH6.5 rep2
- pH7.5 rep2
- pH8.5 rep2

CETSA data plotting\_curve fitting

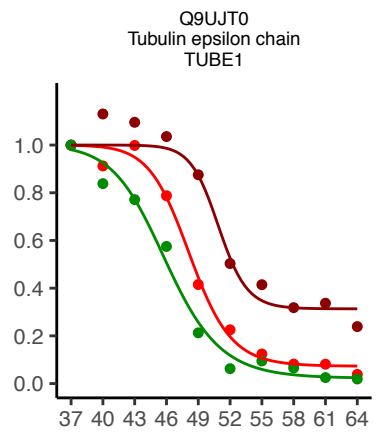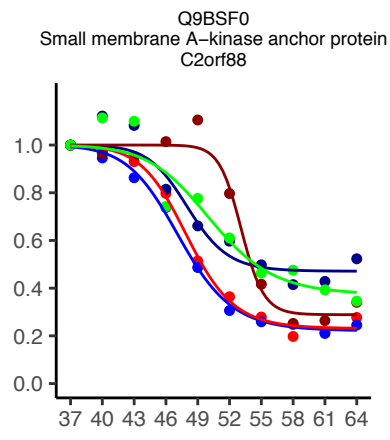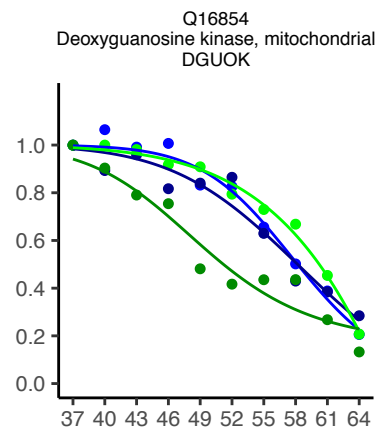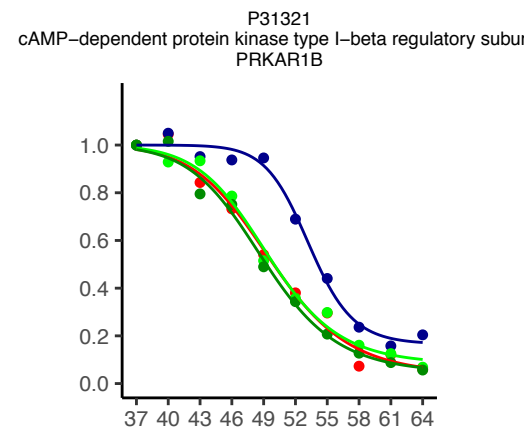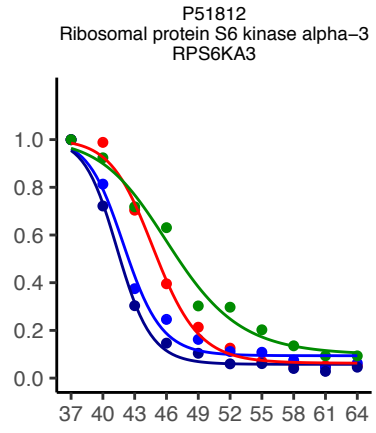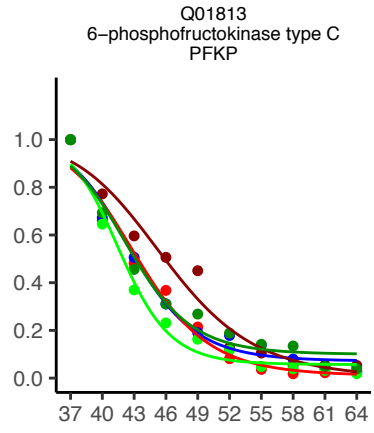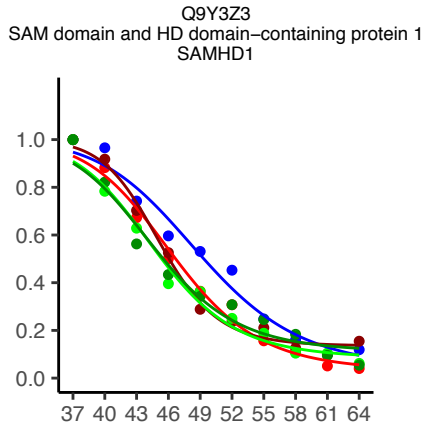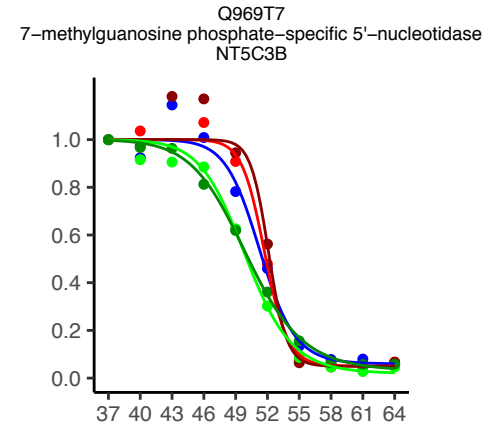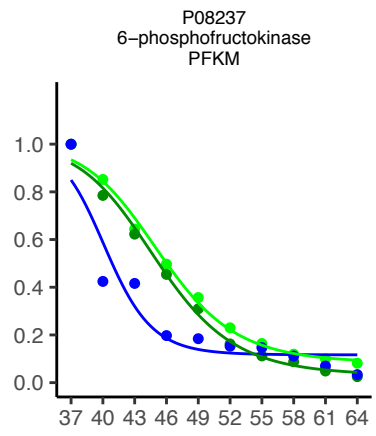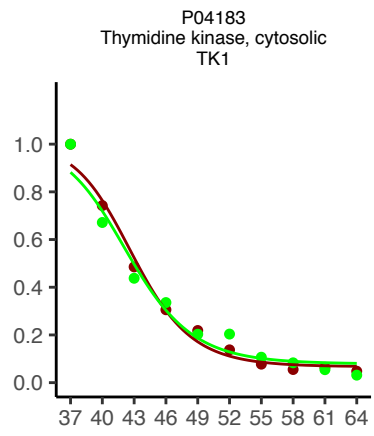

Non-denatured protein fraction

Temperature

- pH6.5 rep1
- pH7.5 rep1
- pH8.5 rep1
- pH6.5 rep2
- pH7.5 rep2
- pH8.5 rep2
