# Supplementary material for: An efficient proteome-wide strategy for discovery and characterization of cellular nucleotide-protein interactions
Source: PubMed Central journal article supplement (PMC6283526; doi:10.1371/journal.pone.0208273), 2018-12-06
Supplement: pone.0208273.s009.pdf [file pone.0208273.s009.pdf]

# ITDR CETSA data plotting

Non-denatured protein fraction

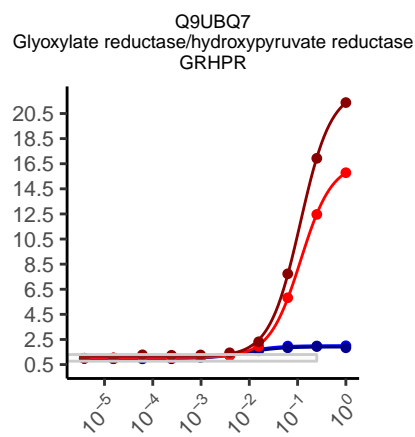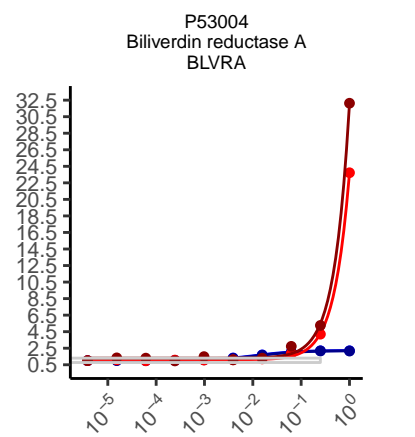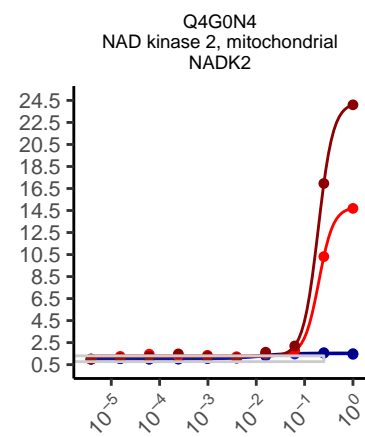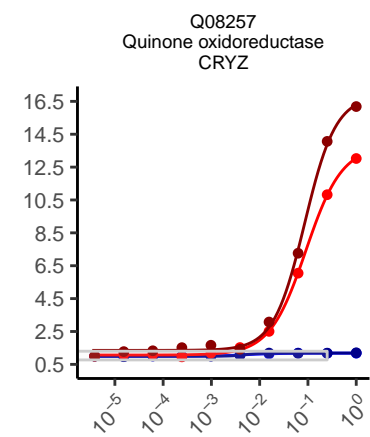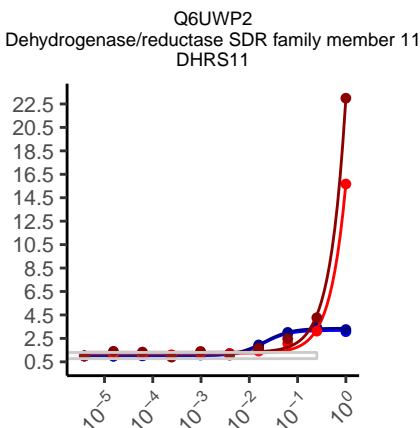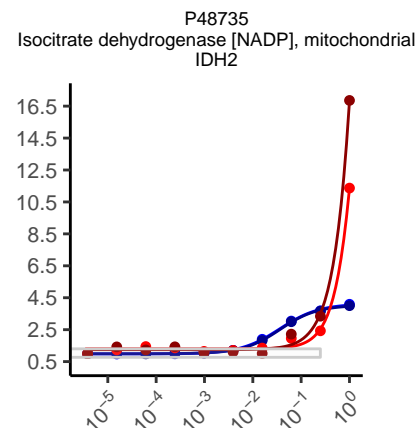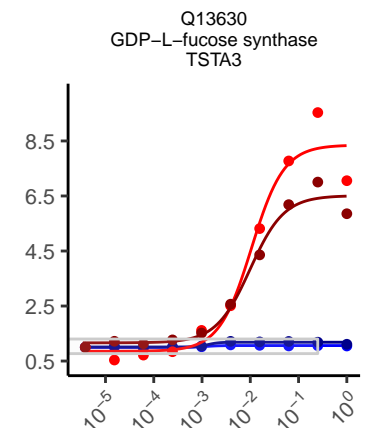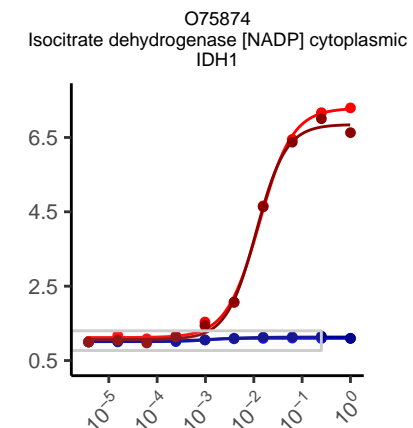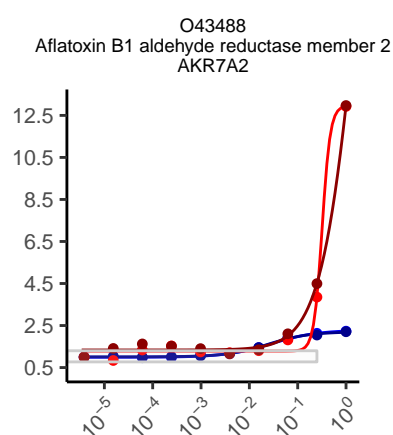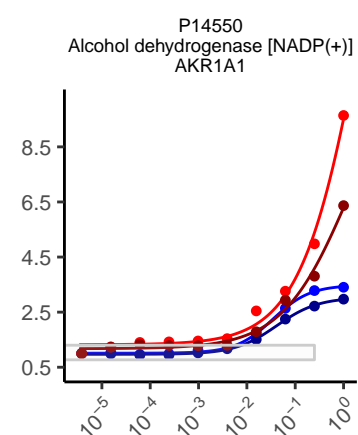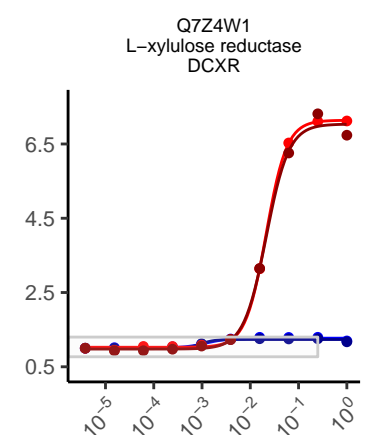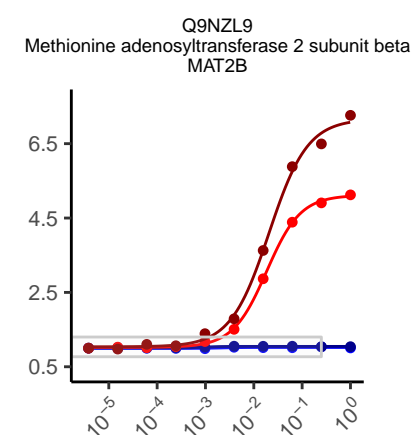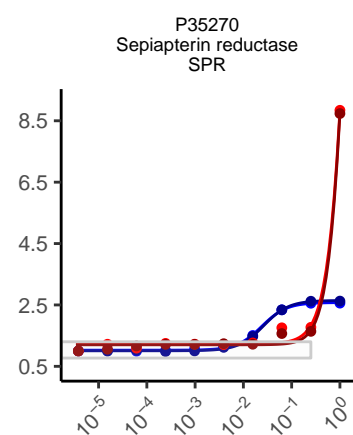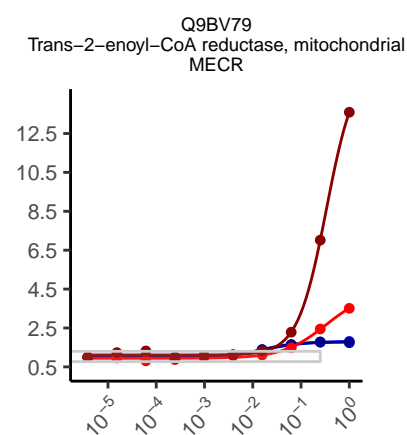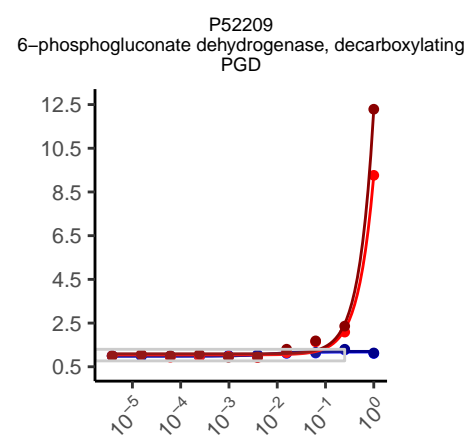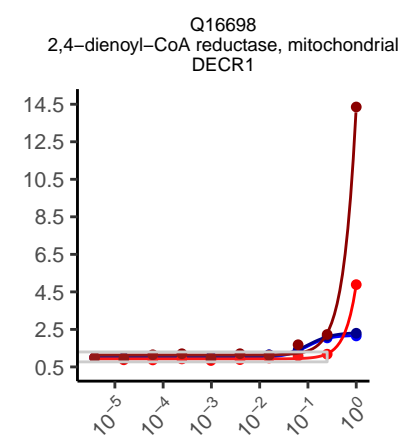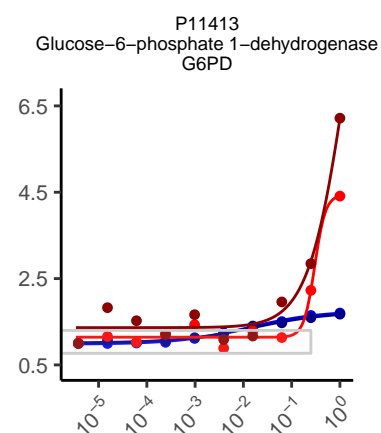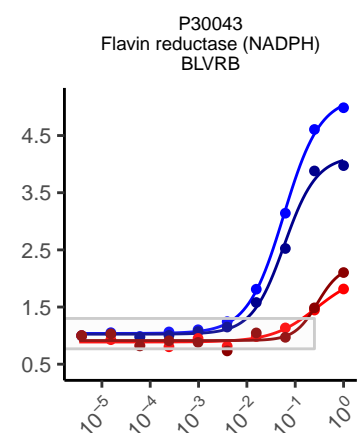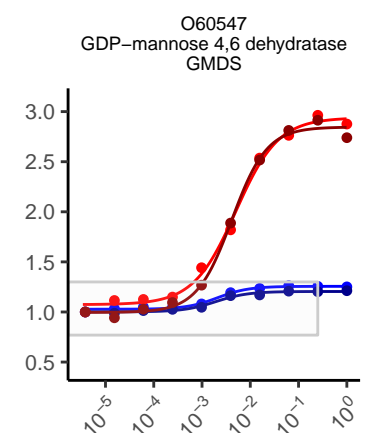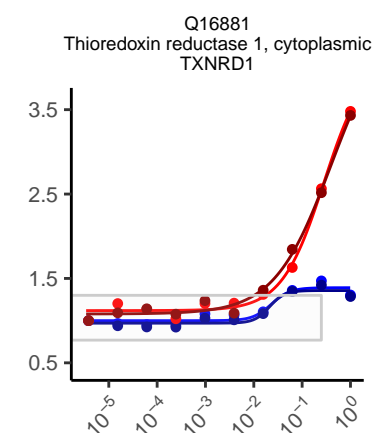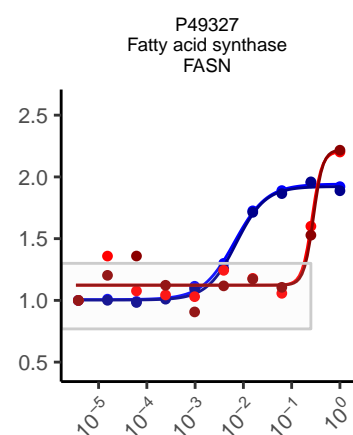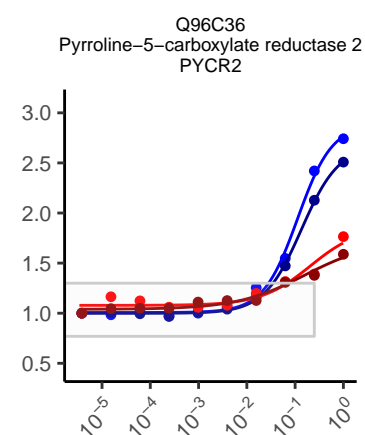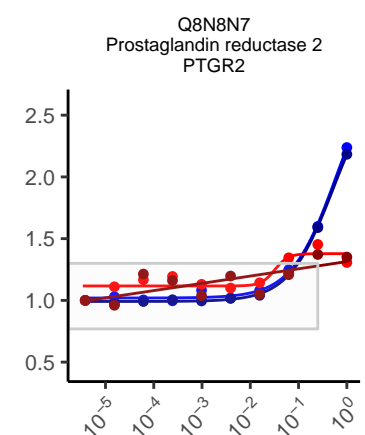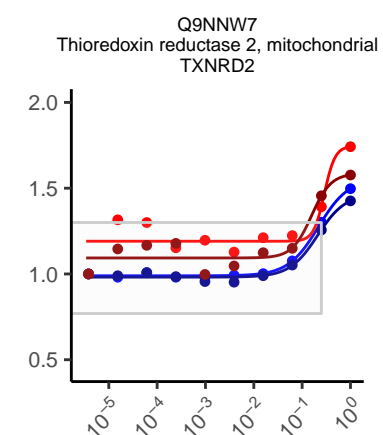

Compound concentration(mM)

● NADPH52.1   
 ● NADPH52.2   
 ● NADPH58.1   
 ● NADPH58.2

# ITDR CETSA data plotting

Non-denatured protein fraction

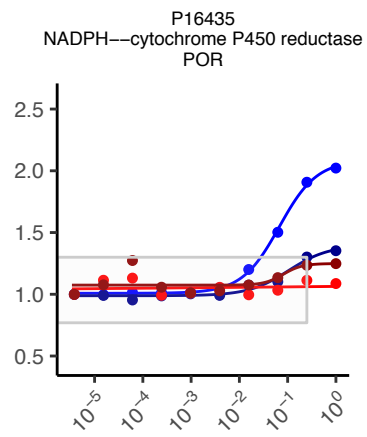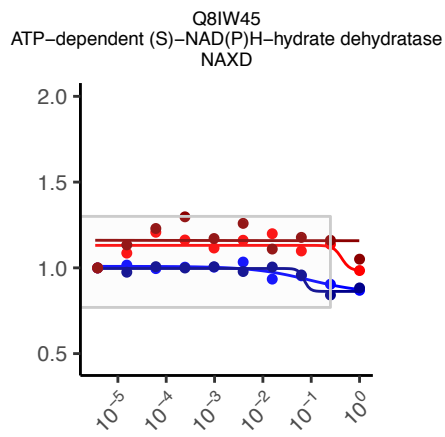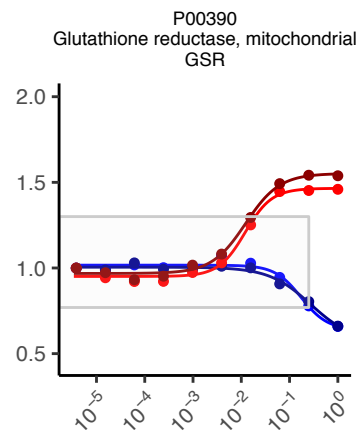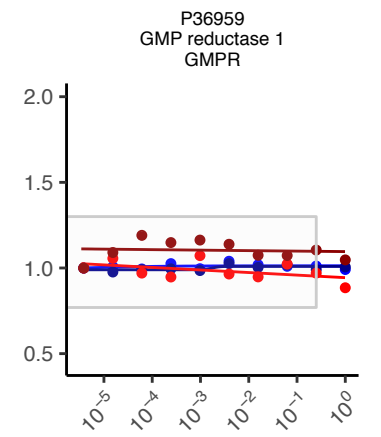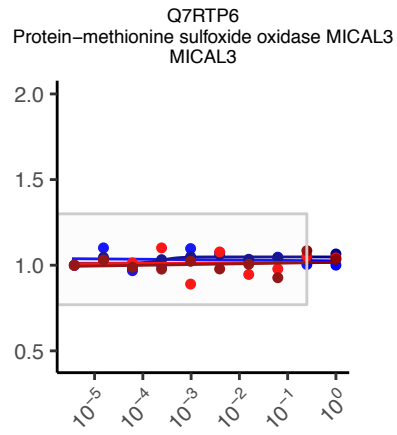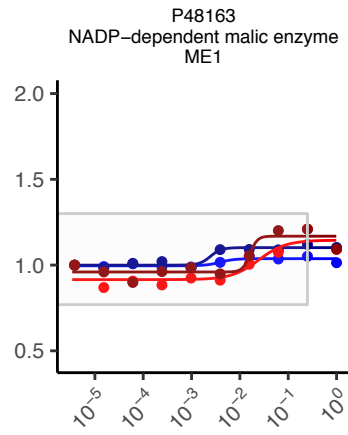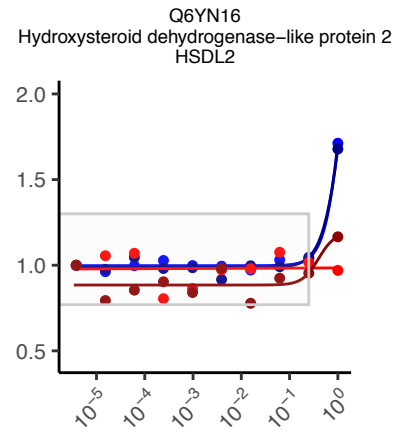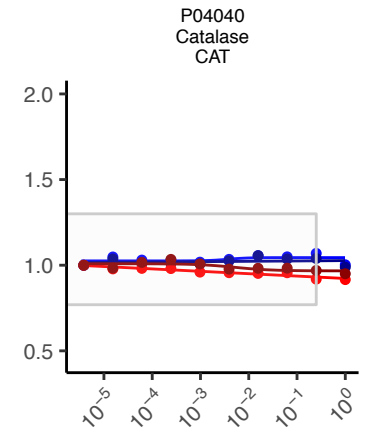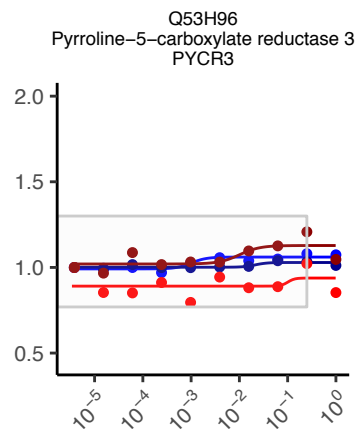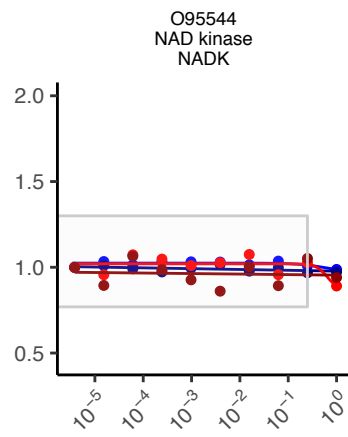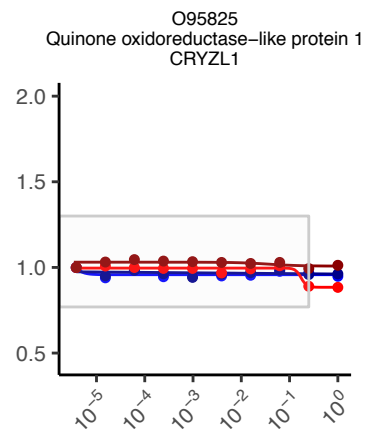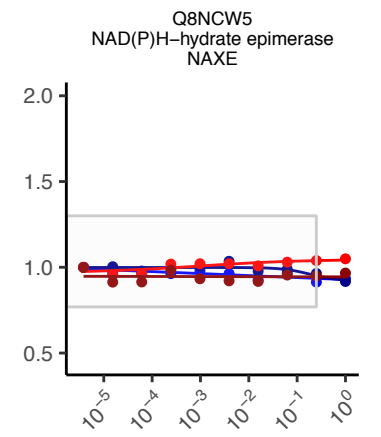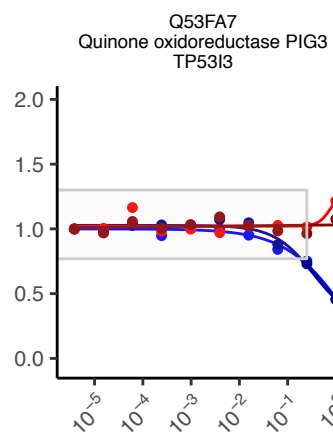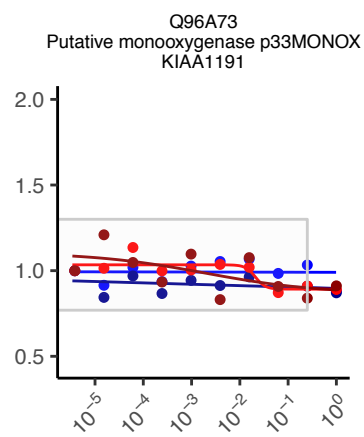

Compound concentration(mM)

● NADPH52.1 ● NADPH52.2 ● NADPH58.1 ● NADPH58.2
