# Supplementary material for: An efficient proteome-wide strategy for discovery and characterization of cellular nucleotide-protein interactions
Source: PLoS One. 2018 Dec 6;13(12):e0208273. doi: 10.1371/journal.pone.0208273 (PMC6283526; doi:10.1371/journal.pone.0208273)
Supplement: S6 Table — Compound groups: nucleotides, deoxynucleosides, nucleosides, deoxynucleotides, nucleobases. Thermal shifts, ΔTagg, are given as changes in temperature. Values range from negative (blue) to positive (brown) ΔTagg. Relates to Figs 3 and 5. (XLSX) [file pone.0208273.s017.xlsx]

## Sheet: TSA purified proteins DLS
Compound name/Enzyme	dCK	RRM1	UMPS_1	UMPS_2
AMP	-0.64491	0.034485	-0.281775	-0.202325
ADP	0.78523	0.30022	-0.50298	-0.21366
ATP	-1.28542	0.18548	-0.541835	-0.179585
XMP	-0.398265	0.09233	6.50789	8.44503
GMP	-0.69368	-0.0348	7.35856	-0.815095
GDP	-0.141385	2.21994	3.68921	-0.308745
GTP	-1.4231	0.570605	-0.11104	-0.141025
UMP	0.618005	-0.20061	4.55194	1.18199
UDP	1.29021	0.325085	2.00036	-0.52108
UTP	0.60274	0.29168	0.1511	-0.46541
CMP	1.28757	0.348745	-0.078575	1.04836
CDP	2.72333	0.58561	-0.031255	0.35799
CTP	1.40588	0.202895	-0.32325	-0.177895
Deoxyinosine	-0.61098	-0.06683	0.061215	0.118145
2-deoxyguanosine	-1.18009	0.027215	-0.054445	-0.428825
2-deoxyadenosine	-0.753095	0.6393	-0.115625	-0.53826
2-deoxyuridine	-0.017885	0.04359	-0.09086	-0.13493
2-deoxycytidine	9.32499	0.31746	-0.04573	-0.049845
thymidine	-0.179115	0.02368	0.028635	-0.300775
Inosine	-0.305755	-0.54811	-0.12145	-0.31348
Adenosine	-0.12648	-0.280895	-0.228125	-0.25087
Xanthosine	-0.34833	-0.73936	-0.138325	-0.65037
guanosine	-0.243545	-1.2017	0.04216	-0.47736
Uridine	-0.17661	-0.98208	-0.19783	-0.672735
Cytidine	-0.845725	0.07734	-0.19564	-0.380085
dAMP	2.29849	-1.00481	-0.552855	-0.364775
dADP	7.87294	-0.81976	-0.52267	-0.34439
dATP	4.57262	3.36691	-0.9413	-0.88004
dGMP	0.272	-1.50177	4.22004	-0.77515
dGDP	3.57679	-0.155225	1.32873	-0.660435
dGTP	1.50046	4.07866	-0.222075	-0.736165
dUMP	-0.541335	-1.56761	3.46288	-1.28407
dUTP	-1.2119	2.15869	-0.60004	-0.78734
dCMP	11.2027	-0.93891	-1.01203	-0.185765
dCDP	12.4774	-1.18933	-1.02956	-0.702055
dCTP	14.561	-0.935375	-1.05441	-1.17783
dTMP	-1.10948	-1.68625	1.44368	-1.04425
dTDP	-2.63591	1.04281	0.176885	-1.94881
dTTP	-3.73852	4.17826	-1.14363	-1.1365
Adenine	-1.2428	-1.39025	-0.61137	-1.53861
Xanthine	-1.17661	-1.56225	-1.0418	-1.58026
Guanine	-1.66602	-1.04407	-0.224795	-1.97848
Uracil	-1.12199	-1.33961	-0.72953	-1.36996
Cytosine	-1.47186	-1.3058	-0.78541	-1.68079
Thymine	-1.64383	-1.55386	-0.87574	-1.74291
Δ Tagg/ °C	from -4 to -3			2,0 -2,5
