# Supplementary material for: An efficient proteome-wide strategy for discovery and characterization of cellular nucleotide-protein interactions
Source: PLOS journal article supplement (doi:10.1371/journal.pone.0208273), 2018-12-06
Supplement: S11 (10.1371/journal.pone.0208273.s011) [file journal.pone.0208273.s011]

ITDR CETSA data plotting

Non-denatured protein fraction

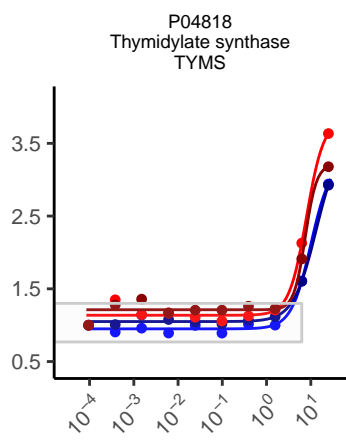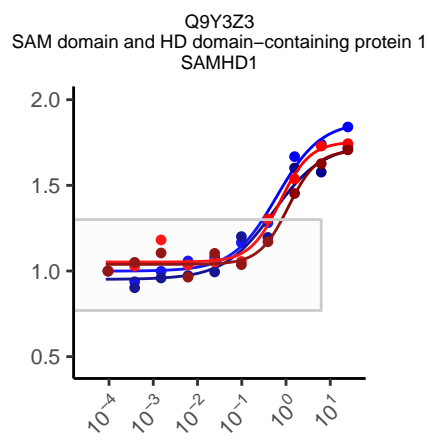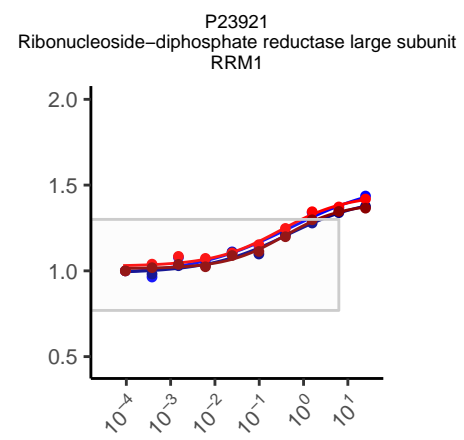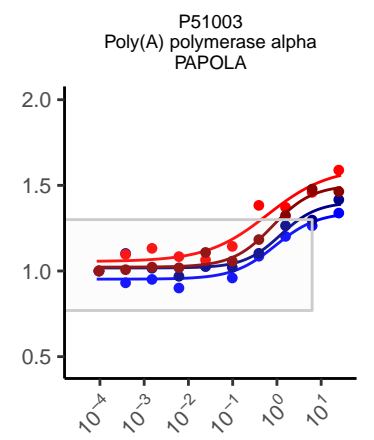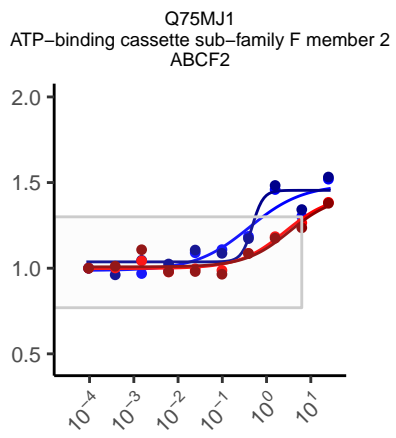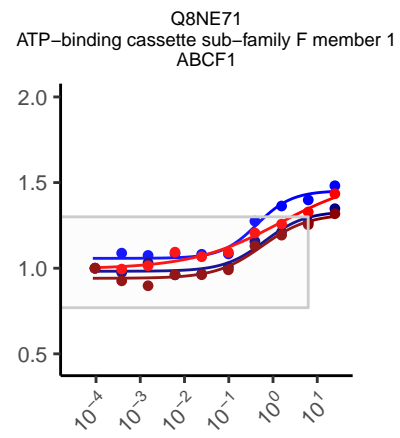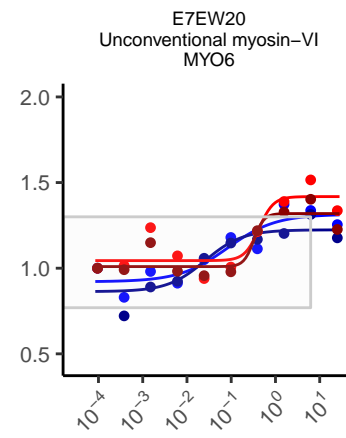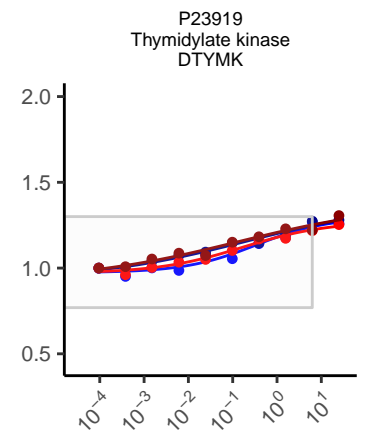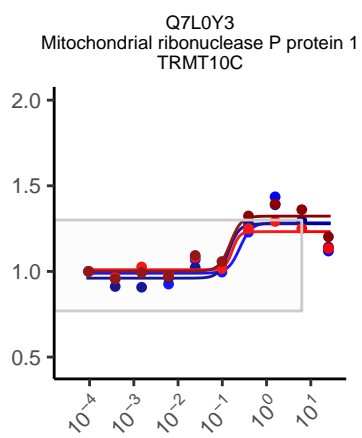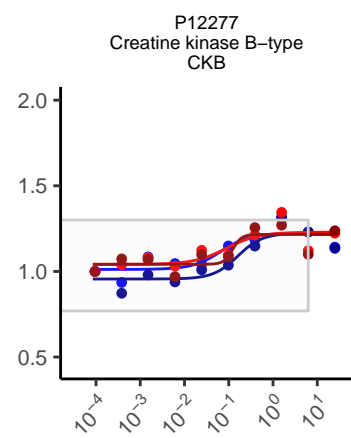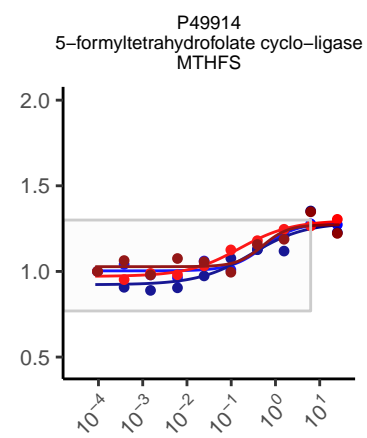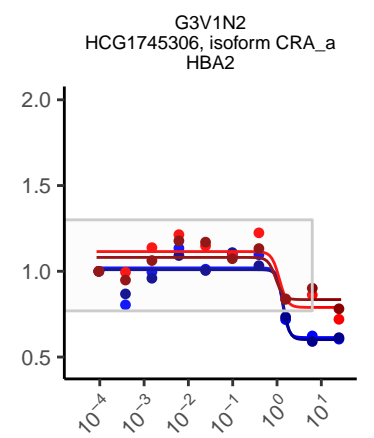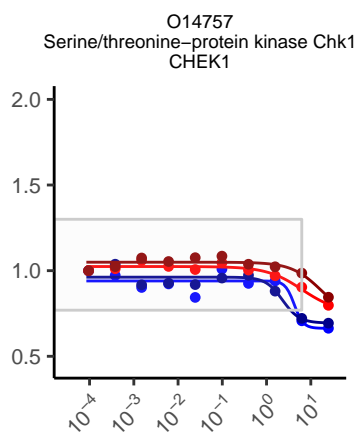

Compound concentration(mM)

● dT\_ID\_b1.1 ● dT\_ID\_b1.2 ● dT\_ID\_b2.1 ● dT\_ID\_b2.2
